# Supplementary material for: A comparison of oral microbiome composition between highly trained competitive athletes and untrained controls
Source: Research Square preprint supplement (doi:10.21203/rs.3.rs-6298163/v1), 2025-05-12
Supplement: Supplementary file 1 [file 0b1619644c722ae5f77a1a94.xlsx]

## Sheet: Nitrate and Nitrite Values
Study Group	Participant ID	Plasma Nitrate (uM)	Saliva Nitrate (uM)	Plasma Nitrite (nM)	Saliva Nitrite (uM)	Oral Nitrite Production (uM)	NO3- consumed per week (mg kg-1)
Trained	1	13.9	354.006	290.26	42.0271	85.3124	123.298
	3	13.91	341.737	178.96	36.0263	146.197	166.94
	8	23.88	2054.79	299.86	176.908	127.82	352.619
	9	13.11	190.028	363.33	105.958	81.7501	156.448
	19	23.88	935.28	424.22	106.623	137.461	218.078
	20	15.96	446.555	224.76	72.1021	35.6941	18.8177
	21	37.55	371.709	78.62	67.7905	109.45	244.669
	22	11.08	484.661	76.73	209.372	205.563	176.578
	24	13.69	179.283	209.74	187.772	139.857
	27	12.79	550.835	189.85	213.705	56.7006	132.414
Untrained	11	9.61	134.824	84.78	64.4261	196.996	179.289
	13	11.33	170.566	175.1	101.484	80.1244	291.625
	14	15.04	111.91	65.63	31.7713	51.3076	174.124
	15		287.036		30.0891	118.957
	16	12.52	157.591	79.91	41.4829	236.528	0
	17	16.11	113.625	70.16	56.8702	324.675	262.772
	23	12.52	263.137	83.36	113.14	222.752	244.822
	30	11.88	147.821	62.99	47.9008	123.869	255.928
	31	23.03	613.322	139.72	118.038	235.963	57.0089
	32	11.42	107.025	113.67	31.2058	206.976	222.679

## Sheet: Physiological Values
Study Group	Participant ID	VO2max (ml/kg/min)	Training per week (minutes)	BMI (kg/m2)	Age (years)	Gingival Index (%)	Salivary Flow Rate (mL/min)	Salivary pH
Trained	1	63.14	386	24.3737	25	7.41	0.208	7.31
	3	64.55	385	21.4786	24	9.375	0.07	6.41
	8	53.57	640	19.6544	48	0	0.126	6.95
	9	65.36	390	22.8484	23	10	0.13	7.535
	19	67.61	981	18.8081	22	2	0.142	7.185
	20	64.8	368	22.8837	30	3	0.418	6.855
	21	55.61	736	19.6725	26	9	0.504	6.89
	22	77.92	578	20.7347	19	0	0.246	6.88
	24	52.53	371	21.1131	41	0	0.464	7.07
	27	48.52	940	21.4335	39	2		6.565
Untrained	11	50.64	0	28.62	35	0	1.302	6.97
	13	50.17	60	30.3503	30	2	0.4898	6.82
	14	43.59	0	21.2953	33	5	0.166	6.93
	15	42.87	57	33.5155	24	0	1.008	6.525
	16	37	0	25.1125	38	5	0.98	7.005
	17	36.29	60	38.2809	18	16	0.19	6.905
	23	32.75	60	23.6002	40	0	0.352	7.33
	30	32.48	0	24.4692	27	0	0.284	6.515
	31	32.14	24	23.7738	26	3.85	0.4096	7.145
	32	28.38	0	24.858	38	2.68	0.48	7.09

## Sheet: Plaque Genus
		Trained										Untrained
Genus	Participant ID	1	3	8	9	19	20	21	22	24	27	11	13	14	15	16	17	23	30	31	32
k..Bacteria.p..Bacteroidota.c..Bacteroidia.o..Bacteroidales.f..Prevotellaceae.g..Prevotella		17.7307	16.8109	2.53261	13.8122	5.51026	3.90673	9.95851	28.2552	14.1609	0.121608	9.37834	6.10714	24.2694	10.4787	11.8797	8.43981	9.44658	20.6344	13.95	2.34971
k..Bacteria.p..Firmicutes.c..Negativicutes.o..Veillonellales.Selenomonadales.f..Veillonellaceae.g..Veillonella		0.660675	12.1929	5.73248	11.0994	6.19832	10.0634	11.7445	5.63766	2.84562	3.11621	1.25614	11.0947	5.40574	0.928494	40.029	17.6888	7.49669	2.0641	2.88248	24.0629
k..Bacteria.p..Firmicutes.c..Bacilli.o..Lactobacillales.f..Streptococcaceae.g..Streptococcus		4.60167	3.83387	2.78283	3.11627	6.7187	7.23393	0.820855	1.59834	0.504145	6.57445	9.69024	14.4573	2.08203	1.07319	12.6126	2.70443	1.20528	0.969401	1.44441	8.30255
k..Bacteria.p..Bacteroidota.c..Bacteroidia.o..Flavobacteriales.f..Flavobacteriaceae.g..Capnocytophaga		21.6409	8.4287	19.2144	21.2055	20.1792	10.1384	8.83096	5.85167	14.8331	13.0197	13.8902	8.7467	5.50608	15.2177	4.39762	17.6249	8.81555	13.3474	18.2768	10.5697
k..Bacteria.p..Proteobacteria.c..Gammaproteobacteria.o..Burkholderiales.f..Neisseriaceae.g..Neisseria		5.74633	0.255591	49.1356	5.23931	10.5869	3.84537	21.9827	0.274192	0.739413	13.6657	0.845973	0.676411	13.0064	28.711	0.267216	19.9461	4.76431	0.672646	9.81945	0
k..Bacteria.p..Fusobacteriota.c..Fusobacteriia.o..Fusobacteriales.f..Fusobacteriaceae.g..Fusobacterium		9.74879	18.7627	1.22839	5.71109	4.00116	7.11802	9.32708	18.9193	9.58996	0.273619	7.94275	3.66972	7.45014	5.4745	1.00779	5.73538	6.58169	9.77974	7.74153	13.5756
k..Bacteria.p..Proteobacteria.c..Gammaproteobacteria.o..Enterobacterales.f..Pasteurellaceae.g..Haemophilus		1.79765	11.0485	1.38004	0	1.54958	22.2131	2.29118	0.294255	0.0896258	5.60158	0.0170904	16.1794	0.225762	0	1.83998	2.04429	1.41352	4.66236	1.7485	1.08841
k..Bacteria.p..Campylobacterota.c..Campylobacteria.o..Campylobacterales.f..Campylobacteraceae.g..Campylobacter		5.92302	5.20476	1.54686	13.6508	7.64961	1.83405	2.11979	4.74152	4.91822	0.88166	5.84063	5.37241	6.34642	4.8354	6.03146	4.38671	4.15852	4.3656	8.31169	6.61297
k..Bacteria.p..Fusobacteriota.c..Fusobacteriia.o..Fusobacteriales.f..Leptotrichiaceae.g..Leptotrichia		3.61835	3.10775	1.21322	3.8674	6.30818	2.65903	4.71766	2.84893	6.76675	9.50065	7.30613	4.54828	4.37727	6.43917	6.50481	2.93867	8.58838	8.96202	6.98765	1.77603
k..Bacteria.p..Actinobacteriota.c..Actinobacteria.o..Micrococcales.f..Micrococcaceae.g..Rothia		0.207421	3.86291	3.18471	3.02315	2.44001	0.729529	0.108245	1.13021	0.459332	14.7374	3.4138	10.1695	0	0.313517	1.74836	0.212947	0.309207	0.520971	3.56034	8.87623
k..Bacteria.p..Actinobacteriota.c..Actinobacteria.o..Corynebacteriales.f..Corynebacteriaceae.g..Corynebacterium		2.48905	0.737729	2.03973	1.99888	9.45938	0.811345	3.07595	2.17348	3.20412	1.11728	17.5091	3.67361	0.501693	2.35138	1.26737	2.0088	2.69452	2.02453	7.57681	4.44794
k..Bacteria.p..Firmicutes.c..Negativicutes.o..Veillonellales.Selenomonadales.f..Selenomonadaceae.g..Selenomonas		6.11508	3.89776	0.128905	6.32566	1.50332	1.26133	3.83366	3.47088	7.94309	0.0456031	1.78167	4.70378	4.10134	2.45991	4.40525	4.09568	3.46438	9.96439	1.79284	0.59725
k..Bacteria.p..Bacteroidota.c..Bacteroidia.o..Bacteroidales.f..Porphyromonadaceae.g..Porphyromonas		1.95898	0.580889	0.159236	0.571109	2.08153	14.4474	9.26394	0.327693	3.41698	0.0304021	1.34587	1.62883	4.55287	3.94308	0	0.553663	12.2925	0.309945	1.85619	0.278978
k..Bacteria.p..Bacteroidota.c..Bacteroidia.o..Bacteroidales.f..Prevotellaceae.g..Alloprevotella		0.176692	2.32356	0.212314	0.235893	0.0867303	0.0272721	0.189428	0	0.145642	0.0684047	1.22196	0.0194371	1.16644	0.168817	0	0.198751	0	0.0527565	0.240735	0.00785855
k..Bacteria.p..Actinobacteriota.c..Actinobacteria.o..Actinomycetales.f..Actinomycetaceae.g..Actinomyces		0.537758	1.49869	2.99515	0.490409	1.68835	2.69312	0.261591	0.835953	0.268877	9.53105	1.73894	3.246	0.0501693	0.204992	3.13025	0	0.511138	0.685835	1.50776	4.28291
k..Bacteria.p..Firmicutes.c..Bacilli.o..Lactobacillales.f..Carnobacteriaceae.g..Granulicatella		0.107552	0.220738	0	0.148985	0.884649	0.374991	0	0.133752	0.358503	0.235616	0.24781	0.688073	0	0.289401	0.152695	0.127768	0.549	0	0	0.444008
k..Bacteria.p..Proteobacteria.c..Gammaproteobacteria.o..Burkholderiales.f..Neisseriaceae.g..Kingella		0.829684	0.360151	1.60752	1.29741	4.49841	3.00675	0.306693	0.287568	2.4199	17.1012	0.0299081	0.112735	1.68067	2.49608	2.57291	0.0638842	0.277655	0.916645	1.00095	3.65029
k..Bacteria.p..Proteobacteria.c..Gammaproteobacteria.o..Cardiobacteriales.f..Cardiobacteriaceae.g..Cardiobacterium		1.81301	0.389195	0.902335	0.701471	0.491472	0.531806	0	0.133752	0.257674	2.10534	6.86605	0.217696	0.238304	3.91897	0.206138	0.319421	1.19897	3.62701	3.26893	1.222
k..Bacteria.p..Patescibacteria.c..Saccharimonadia.o..Saccharimonadales.f..Saccharimonadaceae.g..TM7x		0.299608	0.0464711	0	0.496617	0.0404741	0.0272721	0	0.167191	0	0	0.11536	0.178821	0.765082	0	0.129791	0.205849	0.0252414	0.0659457	0.202724	0.534381
k..Bacteria.p..Patescibacteria.c..Saccharimonadia.o..Saccharimonadales.f..Saccharimonadaceae.g..TM7a		0.875778	0	0	1.16084	1.31252	0.62044	1.63269	0.321006	2.31907	0	0.422987	0.132172	1.54271	1.67611	0	3.74787	6.42393	1.51675	0.595502	0.00785855
k..Bacteria.p..Proteobacteria.c..Gammaproteobacteria.o..Enterobacterales.f..Pasteurellaceae.g..Aggregatibacter		3.941	0.389195	0.62936	0.428332	1.9601	2.03859	1.30796	0	5.28792	0.532036	0.0897244	0.073861	1.09118	0.88026	0	1.2138	2.82703	1.04854	1.2987	0
k..Bacteria.p..Firmicutes.c..Clostridia.o..Lachnospirales.f..Lachnospiraceae.g..Lachnoanaerobaculum		0.0230468	0.284635	0.128905	1.09876	0.612894	0.606804	0.351795	0.454758	0.481739	0	0	0.699736	1.26678	0.217051	0.229043	0.0993754	0.542689	0.672646	0.342097	0.699411
k..Bacteria.p..Patescibacteria.c..Saccharimonadia.o..Saccharimonadales.f..Saccharimonadaceae.g..NA		0.314973	0.307871	0.181984	0.0558694	0.219717	0.197723	0.46906	4.74152	2.73359	0	1.94403	0.921319	1.64305	2.50814	0.167965	1.07183	2.72607	1.68161	0.646183	0.0117878
k..Bacteria.p..Bacteroidota.c..Bacteroidia.o..Bacteroidales.f..Tannerellaceae.g..Tannerella		0.629945	0.0755155	0	0.931156	1.43972	0.497716	2.55277	0.401257	4.30204	0.0988067	0.162358	0.272119	0.852878	0.59086	0.0839823	1.14991	2.81441	1.99156	2.05258	0.0471513
k..Bacteria.p..Firmicutes.c..Clostridia.o..Lachnospirales.f..Lachnospiraceae.g..Oribacterium		0	0.0755155	0.0454959	0	0.0693842	0	0.171387	0.28088	0	0	0	0	0.200677	0	0.129791	0	0.0378621	0.0329728	0	0.0196464
k..Bacteria.p..Firmicutes.c..Clostridia.o..Clostridia.UCG.014.f..NA.g..NA		0	0	0	0.800795	0.341139	0.0545442	0.712611	0.127065	1.85974	0	0	0	1.55525	0.771735	0.267216	0	4.32258	0	0	0
k..Bacteria.p..Bacteroidota.c..Bacteroidia.o..Flavobacteriales.f..Weeksellaceae.g..Bergeyella		0.437889	0.36596	0.803761	0.1614	0.237063	0.797709	0.216489	0	0.3473	1.11728	0.649434	0.291557	0	0.289401	0.0992518	0.674333	0.466965	0.382485	0.114032	3.60314
k..Bacteria.p..Firmicutes.c..Bacilli.o..Staphylococcales.f..Gemellaceae.g..Gemella		0.691404	0.174267	0	0.0744925	0	0.0613622	0	0.14044	0.156845	0	0.606708	0.396517	0.112881	0.108525	0	0.0496877	0.694138	0.125297	0.0570162	0.467583
k..Bacteria.p..Proteobacteria.c..Gammaproteobacteria.o..Burkholderiales.f..Neisseriaceae.g..Eikenella		3.02681	0.563462	1.34213	0.409709	0.387395	0.368173	0.135306	0.107002	0.369706	0.433229	3.24717	0.10496	0	0.675268	0.0229043	0.170358	0.265034	0.296755	0.563826	0.302554
k..Bacteria.p..Firmicutes.c..Negativicutes.o..Veillonellales.Selenomonadales.f..Veillonellaceae.g..Dialister		0.0230468	0.848098	0	0.167608	0.127204	0	0	7.57039	1.23235	0	0	0.0583113	1.19152	0.0844085	0	0	0.258724	0.257188	0.563826	0
k..Bacteria.p..Patescibacteria.c..Saccharimonadia.o..Saccharimonadales.f..Saccharimonadaceae.g..Candidatus.Saccharimonas		0	0	0	0.0620771	0.705406	0.0272721	0.0541223	0.347756	0.918665	0	0.901517	0	0.990844	0.241167	0	0	1.38197	0	0	0
k..Bacteria.p..Spirochaetota.c..Spirochaetia.o..Spirochaetales.f..Spirochaetaceae.g..Treponema		0.176692	1.53355	0	0.490409	0.0289101	0	0.24355	1.25059	1.22115	0	0.0640889	0.0310994	2.10711	0.349693	0.091617	0.503975	0.170379	2.17621	0.411783	0.121807
k..Bacteria.p..Firmicutes.c..Negativicutes.o..Veillonellales.Selenomonadales.f..Selenomonadaceae.g..Centipeda		1.25221	0.273018	0.0303306	0.322801	0.0751662	0.0749983	0.577305	0.294255	1.97177	0	0.0384533	0	2.57118	0.639093	0.122156	1.07183	0.92762	0.870483	0.0126703	0
k..Bacteria.p..Firmicutes.c..Negativicutes.o..Veillonellales.Selenomonadales.f..Selenomonadaceae.g..NA		0.706768	0.0638978	0	0.0744925	0.190807	0	1.87624	0	1.32198	0	0.0897244	0	1.24169	0.289401	0.404642	0.631743	0	0.857294	0.145708	0
k..Bacteria.p..Proteobacteria.c..Gammaproteobacteria.o..Burkholderiales.f..Burkholderiaceae.g..Lautropia		1.02174	0.180076	0.735517	0.105531	0.381613	0.252267	0.324734	0.0267505	0	0.0912062	0.269173	0.72306	0.200677	0.844085	0.16033	0.0638842	0.328138	0.276972	0.0570162	0.11002
k..Bacteria.p..Actinobacteriota.c..Actinobacteria.o..Propionibacteriales.f..Propionibacteriaceae.g..Pseudopropionibacterium		0.184374	0.0464711	0	0	0	0.456808	0.0541223	0	0.0784226	0	0.491348	0.272119	0.150508	0.301459	0	0	0.0567931	0	0	1.85855
k..Bacteria.p..Firmicutes.c..Clostridia.o..Lachnospirales.f..Lachnospiraceae.g..Johnsonella		0.192057	0.20912	0	0.552486	0	0.388628	0.24355	0.0802515	0.179252	0	0.307627	0.279894	0	0	0	0.127768	0	0.0329728	0.513145	0
k..Bacteria.p..Firmicutes.c..Bacilli.o..Erysipelotrichales.f..Erysipelotrichaceae.g..Solobacterium		0	0	0	0.0372463	0	0	0	0.214004	0	0	0	0.0544239	0.16305	0	0	0.0425894	0	0.151675	0.354767	0
k..Bacteria.p..Patescibacteria.c..Saccharimonadia.o..Saccharimonadales.f..NA.g..NA		0	0.580889	0	0	0	0	0.216489	6.52712	2.29666	0	0.269173	0	1.24169	0.0241167	0	0	1.77952	2.84226	0.0570162	0.0117878
k..Bacteria.p..Firmicutes.c..Clostridia.o..Lachnospirales.f..Lachnospiraceae.g..Catonella		0.284244	0.435667	0	0.0744925	0	0.0136361	0	0	0	0	0.00854518	0.0894107	0.150508	0.120584	0	0.028393	0.0757241	0.125297	0.0443459	0
k..Bacteria.p..Actinobacteriota.c..Actinobacteria.o..Actinomycetales.f..Actinomycetaceae.g..F0332		0.215103	0.0290444	0.106157	0	0.0346921	0.62044	0.0270612	0.0334381	0	0	0	0.108848	0	0.0844085	0.0381738	0.0567859	0.107276	1.03535	0	0.0589391

## Sheet: Tongue Genus 
		Trained										Untrained
Genus	Participant ID	1	3	8	9	19	20	21	22	24	27	11	13	14	15	16	17	23	30	31	32
k..Bacteria.p..Bacteroidota.c..Bacteroidia.o..Bacteroidales.f..Prevotellaceae.g..Prevotella		15.9215	11.8289	40.7963	29.2691	14.4841	10.3893	26.2867	35.4655	19.1613	18.0204	36.2735	32.683	18.9363	32.955	35.6637	30.5596	44.5725	38.7311	33.6041	35.5505
k..Bacteria.p..Firmicutes.c..Negativicutes.o..Veillonellales.Selenomonadales.f..Veillonellaceae.g..Veillonella		5.20101	15.8872	16.0058	2.41525	5.48706	1.34368	29.4468	8.8043	16.4611	6.88411	23.9995	15.3929	10.1296	12.4947	16.6821	13.0457	18.8573	15.5358	13.9644	14.3168
k..Bacteria.p..Firmicutes.c..Bacilli.o..Lactobacillales.f..Streptococcaceae.g..Streptococcus		47.3796	30.8462	10.3804	41.3453	35.9547	46.53	3.47024	13.5043	10.6674	30.3028	6.63259	21.3091	15.6383	5.50652	5.07135	16.1042	7.70803	20.1451	12.7517	4.17851
k..Bacteria.p..Bacteroidota.c..Bacteroidia.o..Flavobacteriales.f..Flavobacteriaceae.g..Capnocytophaga		0.238822	0.382166	0.0268644	0.0529661	0	0	0.0419111	0.14067	0.0800053	0.601387	0	0	0	0	1.7452	0.0427168	0	0	0.282586	1.86659
k..Bacteria.p..Proteobacteria.c..Gammaproteobacteria.o..Burkholderiales.f..Neisseriaceae.g..Neisseria		0	0	1.33247	1.89619	1.344	0.429422	0.335289	5.93297	5.11367	9.62926	0.199476	2.57148	23.5118	0.493905	0.112925	3.11833	0.359653	0	0.98905	0.227402
k..Bacteria.p..Fusobacteriota.c..Fusobacteriia.o..Fusobacteriales.f..Fusobacteriaceae.g..Fusobacterium		0.676662	2.72975	0.11283	0.402542	0.377652	0.678764	0.544845	5.05585	2.95353	0.629687	2.6493	0.68333	2.36477	0.977301	8.57202	0.589492	0.596698	1.05063	1.4718	8.92553
k..Bacteria.p..Proteobacteria.c..Gammaproteobacteria.o..Enterobacterales.f..Pasteurellaceae.g..Haemophilus		0.570519	11.556	1.59574	1.49364	14.9617	2.56268	2.25482	10.5999	2.42683	1.18862	5.90325	2.80525	3.39766	0.357293	1.39616	16.1384	1.78192	9.48282	0.659367	1.84764
k..Bacteria.p..Campylobacterota.c..Campylobacteria.o..Campylobacterales.f..Campylobacteraceae.g..Campylobacter		0.68993	0.382166	1.28412	0.127119	0.177719	0	4.32523	0.446835	6.24708	0.672138	1.14699	1.07894	0.398659	3.22615	3.77785	0.435711	3.00801	1.93859	6.69963	3.4584
k..Bacteria.p..Fusobacteriota.c..Fusobacteriia.o..Fusobacteriales.f..Leptotrichiaceae.g..Leptotrichia		0.132679	3.3849	1.35934	0.95339	0.522048	0.443275	8.46605	1.67149	1.84012	1.23815	1.48361	3.73134	0.126846	4.16141	2.80259	0.606578	3.47393	0.413475	4.85105	3.96058
k..Bacteria.p..Actinobacteriota.c..Actinobacteria.o..Micrococcales.f..Micrococcaceae.g..Rothia		2.45456	3.42129	5.6254	5.54025	12.8735	8.64386	1.10645	10.8316	3.68691	5.75209	1.68308	0.584427	2.76343	0.399327	0.903398	7.92824	1.18522	2.06738	1.18921	1.08963
k..Bacteria.p..Bacteroidota.c..Bacteroidia.o..Bacteroidales.f..Porphyromonadaceae.g..Porphyromonas		0.862412	0.327571	0.042983	0.974576	0.8997	12.9381	0.184409	1.04261	1.0334	1.3372	0.0561027	0.341665	6.83157	0	0.0718612	0.290474	0.0817394	0	0	0.142126
k..Bacteria.p..Bacteroidota.c..Bacteroidia.o..Bacteroidales.f..Prevotellaceae.g..Alloprevotella		4.92238	1.31028	1.71395	0.158898	0	0.290899	3.6798	1.89491	9.56064	3.60832	3.19786	1.72631	8.51681	12.747	5.47172	1.05938	5.89341	0.962516	9.86695	6.03563
k..Bacteria.p..Actinobacteriota.c..Actinobacteria.o..Actinomycetales.f..Actinomycetaceae.g..Actinomyces		3.48945	2.72975	2.58973	1.17585	1.13296	1.42679	1.96982	0.132396	1.5001	2.55412	3.12929	1.39363	0.190269	2.25935	1.50909	1.19607	1.01357	1.74202	1.11857	1.67709
k..Bacteria.p..Firmicutes.c..Bacilli.o..Lactobacillales.f..Carnobacteriaceae.g..Granulicatella		0.942019	3.02093	4.42725	4.22669	9.05254	4.68209	1.34954	0.844022	1.13341	5.24975	0.34285	1.46556	3.59699	0.220681	0.790473	2.55446	0.997221	3.29425	0.176616	0.701156
k..Bacteria.p..Patescibacteria.c..Saccharimonadia.o..Saccharimonadales.f..Saccharimonadaceae.g..TM7x		3.01181	2.62056	2.71868	3.20975	0.0999667	0.277047	0	0.0496483	2.87352	0.629687	1.10959	2.6524	0.887922	5.34889	2.06344	0.555318	2.40314	0.338914	2.57859	3.10783
k..Bacteria.p..Actinobacteriota.c..Coriobacteriia.o..Coriobacteriales.f..Atopobiaceae.g..Atopobium		4.82951	0.964513	1.71932	0.423729	0.366544	0	2.12909	0	2.21348	1.0259	2.58073	0.53048	0.335236	3.29971	0.831537	0.538232	2.39496	0.779502	1.9781	0.890658
k..Bacteria.p..Firmicutes.c..Clostridia.o..Lachnospirales.f..Lachnospiraceae.g..Lachnoanaerobaculum		0.411304	0.527753	1.71932	0.222458	0	0	1.99497	0.537857	1.06007	0.353757	1.3527	0.161841	0	1.98613	1.00606	0.751815	0.58035	0.650715	1.21276	1.05173
k..Bacteria.p..Firmicutes.c..Bacilli.o..Erysipelotrichales.f..Erysipelotrichaceae.g..Solobacterium		1.35332	0.78253	1.64947	1.33475	0.122181	0	1.22381	0.15722	1.70011	1.85369	3.39733	1.18684	0.724835	3.77259	0.831537	0.410081	0.907308	0.413475	1.41293	0.871707
k..Bacteria.p..Firmicutes.c..Clostridia.o..Peptostreptococcales.Tissierellales.f..Peptostreptococcaceae.g..Peptostreptococcus		0.490912	4.38581	0.0268644	0.233051	0.499833	0.332456	1.76865	0	1.04007	0.657988	0.0810373	5.57454	0.779197	2.35393	3.89077	0.512601	0.0735655	0.677828	0.353232	3.40155
k..Bacteria.p..Firmicutes.c..Clostridia.o..Lachnospirales.f..Lachnospiraceae.g..Oribacterium		0.331697	0.509554	2.27273	0.540254	0.2999	0.526389	1.81056	0.215143	2.16681	2.5329	0.423887	1.45657	0.181209	0.788146	2.1969	0.504058	0.727481	0.820172	0.977275	2.09399
k..Bacteria.p..Firmicutes.c..Clostridia.o..Clostridia.UCG.014.f..NA.g..NA		0.371501	0	0.499678	0	0	0.0554093	0.804694	0.190319	2.44016	0.643838	0.442588	0.3057	0.0724835	1.66036	0.359306	0	0.212522	0.101674	0.953727	0.379003
k..Bacteria.p..Firmicutes.c..Clostridia.o..Lachnospirales.f..Lachnospiraceae.g..Stomatobaculum		1.76463	0.764331	1.21427	0.582627	0.0888593	0.609503	3.70495	1.69632	0.620041	1.18862	0.554794	0.75526	0	1.29256	1.776	0.803076	0.457741	0.142344	1.09502	1.74341
k..Bacteria.p..Firmicutes.c..Bacilli.o..Staphylococcales.f..Gemellaceae.g..Gemella		0.995091	0.600546	0.220288	2.77542	1.08853	7.75731	0.125733	0.124121	0.246683	0.474034	0.423887	0.485524	0	0.0630517	0.123191	0.367364	0.130783	0.094896	0	0.104226
k..Bacteria.p..Patescibacteria.c..Saccharimonadia.o..Saccharimonadales.f..Saccharimonadaceae.g..Candidatus.Saccharimonas		0.172482	0	0.263271	0.0529661	0	0	0	0.173769	0.613374	0.417433	1.48361	0.161841	0	0.420345	0.92393	0.230671	0.408697	0	0.353232	1.25071
k..Bacteria.p..Firmicutes.c..Clostridia.o..Peptostreptococcales.Tissierellales.f..Anaerovoracaceae.g...Eubacterium..nodatum.group		0.650126	0.727934	0.182678	0.116525	0.166611	0	1.0394	0	0.90006	0.573086	0.716868	0.548463	0.389599	0.945776	0.544092	0.358821	1.07896	0.250796	0.341458	0.407428
k..Bacteria.p..Firmicutes.c..Clostridia.o..Lachnospirales.f..Lachnospiraceae.g..NA		0.159215	0	0	0.243644	0	0	0.796312	0	1.25342	1.15325	0	0	0	0.630517	0	0.529688	0.0245218	0	0.741787	0
k..Bacteria.p..Firmicutes.c..Clostridia.o..Lachnospirales.f..Lachnospiraceae.g..Catonella		0.0928751	0	0	0.158898	0	0	0.402347	0.0661978	0.160011	0.240555	0.0623364	0.22478	0.0724835	0.0735603	0.215584	0.563862	0.26974	0.250796	0	0.255827
k..Bacteria.p..Firmicutes.c..Clostridia.o..Peptostreptococcales.Tissierellales.f..Anaerovoracaceae.g..Mogibacterium		1.16757	0.309372	0.166559	0.0741525	0	0	0.595138	0.0330989	0.0800053	0.176878	0.47999	0.0539471	0.0453022	0.105086	0.184786	0.111064	0.58035	0.115231	0.117744	0.0663256
k..Bacteria.p..Firmicutes.c..Negativicutes.o..Veillonellales.Selenomonadales.f..Selenomonadaceae.g..Selenomonas		0.384768	0	0.0537288	0	0	0	0.142498	0	0.680045	0.410358	0.0498691	0.0179824	0	1.13493	0.482497	0.0939769	0.138957	0	0.259037	0.331628
k..Bacteria.p..Patescibacteria.c..Saccharimonadia.o..Saccharimonadales.f..NA.g..NA		0.331697	0	0	0	0	0.083114	0	0.388912	0.0866724	0	0.143374	0.116885	0.108725	0.325767	0	0	0.0817394	0	0	0.0663256

## Sheet: Plaque Species
		Trained										Untrained
	Participant ID	1	3	8	9	19	20	21	22	24	27	11	13	14	15	16	17	23	30	31	32
Species
k__Bacteria;p__Actinobacteriota;c__Actinobacteria;o__Actinomycetales;f__Actinomycetaceae;g__Actinomyces;s__NA		0.0883534	0.18789	0.981362	0	0.556154	1.88563	0.272045	0.208867	0.227609	0.724914	0.320936	0.296382	0	0.0536337	2.16922	0	0.337386	0.419692	0.495182	3.09539
k__Bacteria;p__Actinobacteriota;c__Actinobacteria;o__Actinomycetales;f__Actinomycetaceae;g__Actinomyces;s__naeslundii		0.15261	0.193951	0.327121	0.40033	0.197345	0	0	0	0	8.05799	1.40684	1.93471	0.0553557	0.107267	0.257646	0	0.146413	0.239824	0.0936831	0.0315856
k__Bacteria;p__Actinobacteriota;c__Actinobacteria;o__Actinomycetales;f__Actinomycetaceae;g__Actinomyces;s__oris		0	1.03037	1.36934	0.101671	0.789379	0.813008	0	0.619863	0.0455218	0.78596	0.0615493	0.448689	0	0.0670421	0.889295	0	0.0318289	0	0.682548	0.860708
k__Bacteria;p__Proteobacteria;c__Gammaproteobacteria;o__Enterobacterales;f__Pasteurellaceae;g__Aggregatibacter;s__NA		3.50201	0.321232	0.631419	0.34314	1.46514	1.65334	1.23827	0	5.37157	0.183136	0	0	1.20399	0.978815	0	1.19707	2.85187	1.05922	1.09743	0
k__Bacteria;p__Proteobacteria;c__Gammaproteobacteria;o__Enterobacterales;f__Pasteurellaceae;g__Aggregatibacter;s__segnis		0.578313	0.0848536	0	0.0953168	0.233226	0.389424	0	0	0	0	0.0923239	0	0	0	0	0	0	0	0.274358	0
k__Bacteria;p__Bacteroidota;c__Bacteroidia;o__Bacteroidales;f__Prevotellaceae;g__Alloprevotella;s__NA		0.184739	1.3516	0.213009	0.241469	0	0.027328	0.196998	0	0.147946	0.0686761	0	0.0205821	0	0.187718	0	0.206902	0	0	0	0
k__Bacteria;p__Bacteroidota;c__Bacteroidia;o__Flavobacteriales;f__Weeksellaceae;g__Bergeyella;s__NA		0.457831	0.381841	0.80639	0.165216	0.245186	0.799344	0.225141	0	0.352794	1.12171	0.668249	0.308731	0	0.321802	0.108045	0.701988	0.471068	0.386383	0.12045	3.6205
k__Bacteria;p__Campylobacterota;c__Campylobacteria;o__Campylobacterales;f__Campylobacteraceae;g__Campylobacter;s__concisus		0.931727	1.04855	0.0228224	7.80327	3.20536	0.143472	0.375235	0.11454	1.74121	0.0457841	0.707817	2.26403	1.53612	1.66264	0.731383	1.8695	0.725699	0	0.595557	0.185565
k__Bacteria;p__Campylobacterota;c__Campylobacteria;o__Campylobacterales;f__Campylobacteraceae;g__Campylobacter;s__gracilis		3.71888	3.76386	1.19437	3.10733	4.53295	0.553392	0.87242	4.66244	3.00444	0.0534147	1.28374	3.04614	4.27622	2.03808	5.75133	1.41875	2.50175	2.20505	5.39347	6.44346
k__Bacteria;p__Campylobacterota;c__Campylobacteria;o__Campylobacterales;f__Campylobacteraceae;g__Campylobacter;s__showae		0.803213	0.581853	0.334728	3.01836	0.173424	1.14094	0.956848	0	0.25037	0.78596	3.99191	0.37871	1.19015	1.46152	0.0831117	1.27836	0.967598	2.19173	2.79042	0.0157928
k__Bacteria;p__Patescibacteria;c__Saccharimonadia;o__Saccharimonadales;f__Saccharimonadaceae;g__Candidatus Saccharimonas;s__NA		0	0	0	0.0635445	0.729578	0.027328	0.0562852	0.350357	0.933197	0	0.927636	0	1.09327	0.268168	0	0	1.39411	0	0	0
k__Bacteria;p__Bacteroidota;c__Bacteroidia;o__Flavobacteriales;f__Flavobacteriaceae;g__Capnocytophaga;s__gingivalis		3.55823	1.66677	6.88475	3.8508	2.57146	1.12045	0.272045	1.94718	0.728349	4.1282	5.19652	1.18553	0.664268	2.60123	0.797872	0	0.254631	0.579575	2.69673	0.442198
k__Bacteria;p__Bacteroidota;c__Bacteroidia;o__Flavobacteriales;f__Flavobacteriaceae;g__Capnocytophaga;s__granulosa		4.81928	0.12728	8.90833	13.9798	4.32963	1.09995	2.9925	1.44859	8.81985	1.59481	3.71934	0.469271	1.12095	3.35211	0.0748005	6.34745	1.37501	5.67584	3.15846	0
k__Bacteria;p__Bacteroidota;c__Bacteroidia;o__Flavobacteriales;f__Flavobacteriaceae;g__Capnocytophaga;s__leadbetteri		0.353414	0.672768	0.692278	1.02942	0	1.98811	1.46341	0	2.4468	1.09119	0	0	0.871852	1.85036	0.448803	6.3105	4.01681	0.806076	1.49224	0
k__Bacteria;p__Bacteroidota;c__Bacteroidia;o__Flavobacteriales;f__Flavobacteriaceae;g__Capnocytophaga;s__NA		10.4819	4.06085	0.174971	0.40033	2.02727	0.143472	1.01313	0.606387	0	2.67837	3.34564	0.362244	0.581234	4.81362	1.87001	1.68477	0.732064	0	4.26927	2.39656
k__Bacteria;p__Bacteroidota;c__Bacteroidia;o__Flavobacteriales;f__Flavobacteriaceae;g__Capnocytophaga;s__ochracea		2.50602	2.2668	1.20959	2.44646	11.9424	1.0043	2.32645	1.86633	2.41266	0.869897	2.01794	7.24489	1.64683	1.19335	1.46277	3.17003	2.06251	5.21617	7.51472	7.7819
k__Bacteria;p__Bacteroidota;c__Bacteroidia;o__Flavobacteriales;f__Flavobacteriaceae;g__Capnocytophaga;s__sputigena		0.86747	0	1.40738	0	0	4.7824	1.11632	0.0269505	0.660066	2.70889	0.0131891	0	1.19015	3.11075	0.132979	0.834996	0.45197	1.20578	0.173983	0
k__Bacteria;p__Proteobacteria;c__Gammaproteobacteria;o__Cardiobacteriales;f__Cardiobacteriaceae;g__Cardiobacterium;s__NA		1.3253	0.30911	0.722708	0.590964	0.508312	0.177632	0	0.134753	0.136565	1.5414	2.48835	0.230519	0	3.91526	0.224402	0.0591148	0.916672	0.499634	3.33244	1.21605
k__Bacteria;p__Proteobacteria;c__Gammaproteobacteria;o__Cardiobacteriales;f__Cardiobacteriaceae;g__Cardiobacterium;s__valvarum		0.570281	0.0969756	0.182579	0.127089	0	0.355264	0	0	0.125185	0.572301	4.57663	0	0.262939	0.442478	0	0.273406	0.292826	3.16435	0.12045	0.0118446
k__Bacteria;p__Firmicutes;c__Clostridia;o__Lachnospirales;f__Lachnospiraceae;g__Catonella;s__NA		0.297189	0.454573	0	0.0762534	0	0.013664	0	0	0	0	0.00879275	0.0946775	0.166067	0.134084	0	0.0295574	0.0763893	0.126574	0.0468415	0
k__Bacteria;p__Firmicutes;c__Negativicutes;o__Veillonellales-Selenomonadales;f__Selenomonadaceae;g__Centipeda;s__NA		1.30924	0.284866	0.0304298	0.330431	0.0777419	0.075152	0.600375	0.296456	2.00296	0	0.0395674	0	2.83698	0.710646	0.132979	1.11579	0.935769	0.879355	0.0133833	0
k__Bacteria;p__Actinobacteriota;c__Actinobacteria;o__Corynebacteriales;f__Corynebacteriaceae;g__Corynebacterium;s__durum		0	0.163646	0.174971	0.146152	0.759479	0.109312	0	0	0.102424	0	0	0.946775	0	0.0938589	0.274269	0	0.0763893	0.0532943	0	0.497473
k__Bacteria;p__Actinobacteriota;c__Actinobacteria;o__Corynebacteriales;f__Corynebacteriaceae;g__Corynebacterium;s__matruchotii		2.60241	0.606097	1.87143	1.89998	9.02404	0.703696	3.19887	2.18973	3.15238	1.12171	18.0164	2.94323	0.553557	2.52078	1.10539	2.09118	2.6418	1.99187	8.00321	3.97189
k__Bacteria;p__Firmicutes;c__Negativicutes;o__Veillonellales-Selenomonadales;f__Veillonellaceae;g__Dialister;s__invisus		0	0.787927	0	0.17157	0.131563	0	0	7.627	1.25185	0	0	0.0617462	0.982563	0	0	0	0.260997	0.259809	0.515257	0
k__Bacteria;p__Proteobacteria;c__Gammaproteobacteria;o__Burkholderiales;f__Neisseriaceae;g__Eikenella;s__corrodens		1.63855	0.515183	1.34652	0.419394	0.40067	0.225456	0.140713	0.107802	0.227609	0	3.30168	0.069979	0	0.750872	0.0249335	0.177344	0	0.29978	0.260974	0.304011
k__Bacteria;p__Proteobacteria;c__Gammaproteobacteria;o__Burkholderiales;f__Neisseriaceae;g__Eikenella;s__NA		1.5261	0.0727317	0	0	0	0.143472	0	0	0.147946	0.434948	0.0395674	0.0411641	0	0	0	0	0.267363	0	0.334582	0
k__Bacteria;p__Actinobacteriota;c__Actinobacteria;o__Actinomycetales;f__Actinomycetaceae;g__F0332;s__NA		0.2249	0.0303049	0.106504	0	0.0358809	0.621712	0.0281426	0.0336882	0	0	0	0.11526	0	0.0938589	0.0415559	0.0591148	0.108218	1.0459	0	0.059223
k__Bacteria;p__Fusobacteriota;c__Fusobacteriia;o__Fusobacteriales;f__Fusobacteriaceae;g__Fusobacterium;s__NA		3.79116	0.648524	0	0.0508356	0	2.28872	2.04503	0	0	0	2.3081	0.609229	1.17631	0.750872	0	0	0.655675	0.41303	0.869914	0.442198
k__Bacteria;p__Fusobacteriota;c__Fusobacteriia;o__Fusobacteriales;f__Fusobacteriaceae;g__Fusobacterium;s__nucleatum		6.40161	17.6374	1.09547	5.73172	4.13826	4.49546	6.18199	19.0608	9.74166	0.274704	5.86477	3.27666	7.04401	5.33655	1.09707	5.97059	5.69737	9.46639	7.09315	13.1988
k__Bacteria;p__Fusobacteriota;c__Fusobacteriia;o__Fusobacteriales;f__Fusobacteriaceae;g__Fusobacterium;s__periodonticum		0	1.29099	0.136934	0.0635445	0	0.348432	1.4728	0	0	0	0	0	0	0	0	0	0.28646	0	0.214133	0
k__Bacteria;p__Firmicutes;c__Bacilli;o__Staphylococcales;f__Gemellaceae;g__Gemella;s__morbillorum		0.722892	0.181829	0	0.0762534	0	0.061488	0	0.0673764	0.159326	0	0.624286	0.156424	0.12455	0.120676	0	0.0517254	0.420141	0.126574	0.0602248	0.406665
k__Bacteria;p__Firmicutes;c__Bacilli;o__Lactobacillales;f__Carnobacteriaceae;g__Granulicatella;s__adiacens		0	0.230317	0	0.152507	0.436551	0.37576	0	0	0	0.236551	0	0.164656	0	0	0	0	0.0700236	0	0	0.177669
k__Bacteria;p__Firmicutes;c__Bacilli;o__Lactobacillales;f__Carnobacteriaceae;g__Granulicatella;s__NA		0.11245	0	0	0	0.478412	0	0	0.134753	0.364174	0	0.25499	0.563948	0	0.321802	0.166223	0.133008	0.483799	0	0	0.268478
k__Bacteria;p__Proteobacteria;c__Gammaproteobacteria;o__Enterobacterales;f__Pasteurellaceae;g__Haemophilus;s__parainfluenzae		1.84739	11.3946	1.38456	0	1.51298	22.2587	2.38274	0.296456	0.0910436	5.62381	0	13.5512	0.2491	0	2.00299	2.12813	1.42593	4.70988	1.8469	1.09365
k__Bacteria;p__Firmicutes;c__Clostridia;o__Lachnospirales;f__Lachnospiraceae;g__Johnsonella;s__NA		0.200803	0	0	0.565546	0	0.389424	0.253283	0.0808516	0.182087	0	0	0.26345	0	0	0	0.133008	0	0.0333089	0.542024	0
k__Bacteria;p__Proteobacteria;c__Gammaproteobacteria;o__Burkholderiales;f__Neisseriaceae;g__Kingella;s__NA		0.48996	0.163646	1.61278	0	1.91963	2.9036	0.140713	0.289718	2.00296	17.169	0.0307746	0	0.470523	0	0.548537	0.0665041	0.280094	0.799414	0	3.66788
k__Bacteria;p__Proteobacteria;c__Gammaproteobacteria;o__Burkholderiales;f__Neisseriaceae;g__Kingella;s__oralis		0.37751	0.212134	0	1.32808	0.364789	0.109312	0	0	0	0	0	0.119376	0	0.201126	2.25233	0	0	0.126574	1.05728	0
k__Bacteria;p__Firmicutes;c__Clostridia;o__Lachnospirales;f__Lachnospiraceae;g__Lachnoanaerobaculum;s__NA		0.0240964	0.260622	0.129327	0.98494	0.550173	0.608048	0.365854	0.458159	0.398316	0	0	0.740954	1.39773	0.241352	0.249335	0.103451	0.547457	0.679502	0.361349	0.70278
k__Bacteria;p__Proteobacteria;c__Gammaproteobacteria;o__Burkholderiales;f__Burkholderiaceae;g__Lautropia;s__mirabilis		0.15261	0.18789	0	0.108026	0.39469	0.252784	0.337711	0.0269505	0	0	0.276972	0.399292	0	0.134084	0	0.0665041	0.33102	0	0	0
k__Bacteria;p__Proteobacteria;c__Gammaproteobacteria;o__Burkholderiales;f__Burkholderiaceae;g__Lautropia;s__mirabilis		0.915663	0	0.737923	0	0	0	0	0	0	0.0915681	0	0.366361	0.221423	0.804505	0.174535	0	0	0.279795	0.0602248	0.11055
k__Bacteria;p__Fusobacteriota;c__Fusobacteriia;o__Fusobacteriales;f__Leptotrichiaceae;g__Leptotrichia;s__goodfellowii		0	0.424268	0	0	0.0717618	0.095648	0.150094	0	0	0.0457841	0.0923239	0	0	0	0.0415559	0	0	0	0	0
k__Bacteria;p__Fusobacteriota;c__Fusobacteriia;o__Fusobacteriales;f__Leptotrichiaceae;g__Leptotrichia;s__hofstadii		1.25301	0.236378	0.266261	1.44881	2.48176	0	0	0.303194	2.43542	0.503625	0.189044	0.761536	0	1.23357	0	0.376857	2.6227	1.28572	0.642398	0.584334
k__Bacteria;p__Fusobacteriota;c__Fusobacteriia;o__Fusobacteriales;f__Leptotrichiaceae;g__Leptotrichia;s__NA		1.43775	2.58197	0.83682	0.635445	2.2605	2.4117	1.73546	0.768091	1.53636	8.98894	7.21885	0.107027	3.59812	1.76991	3.14162	0.613316	1.20313	2.4582	6.54443	1.20025
k__Bacteria;p__Fusobacteriota;c__Fusobacteriia;o__Fusobacteriales;f__Leptotrichiaceae;g__Leptotrichia;s__wadei		0.305221	0	0.114112	1.52507	1.71032	0.027328	2.54221	1.79895	2.23057	0	0	3.94764	0.982563	0	3.89794	0.731545	4.49424	5.00966	0.194058	0
k__Bacteria;p__Patescibacteria;c__Saccharimonadia;o__Saccharimonadales;f__Saccharimonadaceae;g__NA;s__NA		0.329317	0.321232	0.182579	0.0571901	0.227246	0.198128	0.487805	4.77698	2.77683	0	2.00035	0.97559	1.8129	2.78895	0.182846	1.11579	2.75002	1.69875	0.682548	0.0118446
k__Bacteria;p__Firmicutes;c__Clostridia;o__Clostridia UCG-014;f__NA;g__NA;s__NA		0	0	0	0.819724	0.352829	0.054656	0.741088	0.128015	1.88915	0	0	0	1.71603	0.858139	0.290891	0	4.36056	0	0	0
k__Bacteria;p__Firmicutes;c__Negativicutes;o__Veillonellales-Selenomonadales;f__Selenomonadaceae;g__NA;s__NA		0.738956	0.0666707	0	0.0762534	0.197345	0	1.95122	0	1.34289	0	0.0923239	0	1.37005	0.321802	0.440492	0.657652	0	0.866032	0.153908	0
k__Bacteria;p__Patescibacteria;c__Saccharimonadia;o__Saccharimonadales;f__NA;g__NA;s__NA		0	0.606097	0	0	0	0	0.225141	6.57593	2.33299	0	0.276972	0	1.37005	0.0268168	0	0	1.79515	2.87123	0.0602248	0.0118446
k__Bacteria;p__Proteobacteria;c__Gammaproteobacteria;o__Burkholderiales;f__Neisseriaceae;g__Neisseria;s__bacilliformis		0.15261	0.0606097	3.1647	0.667217	0.42459	0.286944	0.469043	0	0	0	0	0.0164656	0	0	0	0	0.0954867	0.0266471	2.78373	0
k__Bacteria;p__Proteobacteria;c__Gammaproteobacteria;o__Burkholderiales;f__Neisseriaceae;g__Neisseria;s__elongata		3.47791	0.0727317	3.02016	0.266887	0	2.86944	0.337711	0	0	10.3777	0	0.0823282	4.553	7.52212	0	0.701988	0.0254631	0.539604	6.73849	0
k__Bacteria;p__Proteobacteria;c__Gammaproteobacteria;o__Burkholderiales;f__Neisseriaceae;g__Neisseria;s__mucosa		0.441767	0.0909146	16.2343	2.69429	0.705657	0	4.01501	0	0	0.358642	0	0.580414	8.44174	0	0	0.310352	0	0.11325	0	0
k__Bacteria;p__Proteobacteria;c__Gammaproteobacteria;o__Burkholderiales;f__Neisseriaceae;g__Neisseria;s__NA		0.771084	0	24.1993	0	5.36419	0.266448	0	0.222342	0.170707	2.74704	0	0	0.941046	7.72325	0.290891	0	1.19677	0	0.789615	0
k__Bacteria;p__Proteobacteria;c__Gammaproteobacteria;o__Burkholderiales;f__Neisseriaceae;g__Neisseria;s__oralis		1.09237	0.0424268	1.47585	0	0	0.430416	0	0	0.443837	0	0.857294	0	0.415167	0	0	0.0960615	0	0	0	0
k__Bacteria;p__Proteobacteria;c__Gammaproteobacteria;o__Burkholderiales;f__Neisseriaceae;g__Neisseria;s__subflava		0.0722892	0	1.20198	1.73477	4.45521	0	18.0394	0.0539011	0.136565	0.236551	0.0131891	0.0370477	0	16.6801	0	19.6557	3.48845	0	0.0602248	0
k__Bacteria;p__Firmicutes;c__Clostridia;o__Lachnospirales;f__Lachnospiraceae;g__Oribacterium;s__NA		0	0.0787927	0.0456447	0	0.0717618	0	0.178236	0.282981	0	0	0	0	0.221423	0	0.14129	0	0.0381947	0.0333089	0	0.019741
k__Bacteria;p__Bacteroidota;c__Bacteroidia;o__Bacteroidales;f__Porphyromonadaceae;g__Porphyromonas;s__catoniae		0	0	0.159757	0	0.556154	0.403088	0	0	1.22909	0.0305227	0.382485	0	0	0.496112	0	0.576369	0	0.313104	0.180675	0.280322
k__Bacteria;p__Bacteroidota;c__Bacteroidia;o__Bacteroidales;f__Porphyromonadaceae;g__Porphyromonas;s__NA		1.90361	0.254561	0	0.362204	1.5967	14.0739	9.63415	0.330144	2.19643	0	0.791348	1.70419	4.02712	3.75436	0	0	12.4005	0	1.69968	0
k__Bacteria;p__Bacteroidota;c__Bacteroidia;o__Bacteroidales;f__Prevotellaceae;g__Prevotella;s__denticola		0.0401606	0.0121219	0.631419	1.84915	0.615955	0	0.487805	1.59008	0	0	0	0	1.67451	0	0	0	0.324655	2.4049	0.0736081	0
k__Bacteria;p__Bacteroidota;c__Bacteroidia;o__Bacteroidales;f__Prevotellaceae;g__Prevotella;s__loescheii		15.992	1.43039	0	9.32198	2.46382	3.0744	0.21576	0	4.96188	0	6.86714	1.06615	5.16192	5.01475	0.864362	3.58383	1.19677	3.78389	0.147216	1.64245
k__Bacteria;p__Bacteroidota;c__Bacteroidia;o__Bacteroidales;f__Prevotellaceae;g__Prevotella;s__maculosa		0	0.842475	0	0.184279	0.334888	0	0.140713	0.303194	0.716968	0	0	0.0246985	0.235262	0.0938589	0.21609	0.162566	0.33102	0.18653	0.535332	0
k__Bacteria;p__Bacteroidota;c__Bacteroidia;o__Bacteroidales;f__Prevotellaceae;g__Prevotella;s__melaninogenica		0.37751	1.2728	0	0.463875	0.0358809	0.642208	2.11069	0	0.682827	0.122091	0.114306	1.61775	2.25574	1.68946	5.61835	0.716766	2.51448	0.179868	0	0
k__Bacteria;p__Bacteroidota;c__Bacteroidia;o__Bacteroidales;f__Prevotellaceae;g__Prevotella;s__NA		0	0.897024	0.0912895	0.730762	0.80732	0.03416	0.253283	1.35426	2.66302	0	0	0.0123492	1.90977	0.415661	0.207779	0.0960615	1.06945	4.64326	0.200749	0
k__Bacteria;p__Bacteroidota;c__Bacteroidia;o__Bacteroidales;f__Prevotellaceae;g__Prevotella;s__nigrescens		0.064257	1.30311	0	0.324077	0.592034	0	0.572233	11.3192	2.16229	0	1.56951	0	3.98561	0.402253	0	0.421193	2.46992	2.56479	1.63945	0.0078964
k__Bacteria;p__Bacteroidota;c__Bacteroidia;o__Bacteroidales;f__Prevotellaceae;g__Prevotella;s__oris		0.136546	8.98842	0	0.28595	0.370769	0	0.984991	3.62485	1.43394	0	0.936428	0.946775	1.50844	0	0.290891	0.620705	0.509262	3.65732	7.16006	0.710676
k__Bacteria;p__Bacteroidota;c__Bacteroidia;o__Bacteroidales;f__Prevotellaceae;g__Prevotella;s__oulorum		0	0.0545488	1.1259	0.622736	0.275087	0.020496	0.834897	0.249293	1.26323	0	0	1.86473	0.221423	0	0.332447	0.509865	0.935769	1.25241	0.260974	0
k__Bacteria;p__Bacteroidota;c__Bacteroidia;o__Bacteroidales;f__Prevotellaceae;g__Prevotella;s__saccharolytica		0.281124	0	0	0.139798	0.131563	0.088816	0.984991	0	0.50074	0	0.0395674	0.144074	0.179906	0.375436	0	0	0.140047	0	0.100375	0
k__Bacteria;p__Bacteroidota;c__Bacteroidia;o__Bacteroidales;f__Prevotellaceae;g__Prevotella;s__salivae		0	0	0.304298	0	0.0239206	0	0.347092	0.148228	0	0	0	0	0.138389	0	5.16124	0.214291	0	0.0466325	0.0869914	0
k__Bacteria;p__Bacteroidota;c__Bacteroidia;o__Bacteroidales;f__Prevotellaceae;g__Prevotella;s__veroralis		0	2.08497	0.38798	0.0508356	0	0	0.628518	9.87738	0	0	0	0.0246985	4.29006	0.0938589	0	0	0	1.97855	0.0468415	0
k__Bacteria;p__Actinobacteriota;c__Actinobacteria;o__Propionibacteriales;f__Propionibacteriaceae;g__Pseudopropionibacterium;s__NA		0.0883534	0	0	0	0	0.457744	0.0562852	0	0.0796631	0	0.466016	0.177006	0.166067	0.335211	0	0	0.057292	0	0	1.80433
k__Bacteria;p__Actinobacteriota;c__Actinobacteria;o__Micrococcales;f__Micrococcaceae;g__Rothia;s__aeria		0.0883534	0.921268	1.30087	0.349495	0.0538213	0.368928	0.0469043	0.0471635	0	11.5376	1.51675	0.782118	0	0.348619	0.290891	0.0665041	0.140047	0.153221	0.100375	0
k__Bacteria;p__Actinobacteriota;c__Actinobacteria;o__Micrococcales;f__Micrococcaceae;g__Rothia;s__dentocariosa		0.128514	3.10928	1.89426	2.70064	2.4698	0.362096	0.065666	1.05107	0.466598	3.2583	1.99596	9.98642	0	0	1.61237	0.0812828	0.171876	0.37306	3.66033	8.91898
k__Bacteria;p__Firmicutes;c__Negativicutes;o__Veillonellales-Selenomonadales;f__Selenomonadaceae;g__Selenomonas;s__NA		4.15261	0.406085	0.0532522	1.06755	0.125583	0.075152	0.168856	2.30427	1.3998	0	0.993581	1.6054	0.650429	0	1.74535	0	0.439239	3.04443	0.622323	0.0513266
k__Bacteria;p__Firmicutes;c__Negativicutes;o__Veillonellales-Selenomonadales;f__Selenomonadaceae;g__Selenomonas;s__noxia		1.91968	3.38202	0.0760746	3.93976	1.21397	1.18877	3.71482	0.451422	6.24787	0	0.0879275	3.26431	1.20399	2.3867	2.85904	3.92374	2.33624	6.62847	0.936831	0.5488
k__Bacteria;p__Firmicutes;c__Negativicutes;o__Veillonellales-Selenomonadales;f__Selenomonadaceae;g__Selenomonas;s__sputigena		0.15261	0.278805	0	0.247824	0	0	0.103189	0.491847	0.25037	0	0	0	2.67091	0.201126	0.191157	0.33991	0.502896	0.319766	0.107066	0
k__Bacteria;p__Firmicutes;c__Bacilli;o__Erysipelotrichales;f__Erysipelotrichaceae;g__Solobacterium;s__moorei		0	0	0	0.0381267	0	0	0	0.215604	0	0	0	0.0576298	0.179906	0	0	0.0443361	0	0.153221	0.374732	0
k__Bacteria;p__Firmicutes;c__Bacilli;o__Lactobacillales;f__Streptococcaceae;g__Streptococcus;s__cristatus		1.42972	0.12728	0.174971	0.0508356	0.179404	0.403088	0.121951	0	0.204848	0	0.668249	0	0.595073	0	0.157912	0.147787	0.254631	0.37306	0.361349	0.0157928
k__Bacteria;p__Firmicutes;c__Bacilli;o__Lactobacillales;f__Streptococcaceae;g__Streptococcus;s__gordonii		0.369478	0	0.342335	0.254178	0.430571	0.081984	0.0750469	0.202129	0	0.0763068	0	0.922076	0	0	0.099734	0.354689	0.16551	0	0	0.0513266
k__Bacteria;p__Firmicutes;c__Bacilli;o__Lactobacillales;f__Streptococcaceae;g__Streptococcus;s__intermedius		0.0803213	0.290927	0	0	0.544193	0.13664	0	0.074114	0	0	0.0439638	0.362244	0	0	0	0.0517254	0	0.119912	0.153908	2.28206
k__Bacteria;p__Firmicutes;c__Bacilli;o__Lactobacillales;f__Streptococcaceae;g__Streptococcus;s__mitis		0	1.988	0	0.273241	4.29374	0	0	0.0943269	0	0	5.78124	1.05792	0	0.294985	0	0.502475	0	0	0	0.43825
k__Bacteria;p__Firmicutes;c__Bacilli;o__Lactobacillales;f__Streptococcaceae;g__Streptococcus;s__NA		1.9759	0.163646	0.677064	0.667217	0.0717618	0	0	0.350357	0	0	0.55834	4.314	0.678107	0	2.24402	0.657652	0.490165	0.399707	0.535332	3.12697
k__Bacteria;p__Firmicutes;c__Bacilli;o__Lactobacillales;f__Streptococcaceae;g__Streptococcus;s__oralis		0.64257	0.921268	1.15633	1.58226	1.22593	5.71838	0.65666	0.518798	0.307272	0.587562	0.457223	7.67299	0.816496	0.362027	8.96775	0.864553	0.197339	0	0	2.24653
k__Bacteria;p__Firmicutes;c__Bacilli;o__Lactobacillales;f__Streptococcaceae;g__Streptococcus;s__sanguinis		0.289157	0.509122	0.441232	0.362204	0.203325	0.908656	0	0	0	5.93667	2.4312	0.864447	0.207584	0.536337	1.3381	0.0738934	0.108218	0.0866032	0.388116	0.150032
k__Bacteria;p__Bacteroidota;c__Bacteroidia;o__Bacteroidales;f__Tannerellaceae;g__Tannerella;s__NA		0.658635	0.0787927	0	0.953168	1.48906	0.498736	2.65478	0.404258	4.37009	0.0991988	0.127495	0.288149	0.941046	0.657013	0.0914229	1.19707	2.83914	2.01186	2.16809	0.0473784
k__Bacteria;p__Patescibacteria;c__Saccharimonadia;o__Saccharimonadales;f__Saccharimonadaceae;g__TM7a;s__NA		0.915663	0	0	1.18828	1.35749	0.621712	1.69794	0.323407	2.35575	0	0.435241	0.139958	1.70219	1.86377	0	3.90157	6.48036	1.53221	0.629015	0.0078964
k__Bacteria;p__Patescibacteria;c__Saccharimonadia;o__Saccharimonadales;f__Saccharimonadaceae;g__TM7x;s__NA		0.313253	0.0484878	0	0.508356	0.041861	0.027328	0	0.168441	0	0	0.118702	0.189355	0.844174	0	0.14129	0.214291	0.0254631	0.0666178	0.214133	0.536955
k__Bacteria;p__Spirochaetota;c__Spirochaetia;o__Spirochaetales;f__Spirochaetaceae;g__Treponema;s__socranskii		0	0.509122	0	0.324077	0.0299007	0	0.253283	1.25994	1.09252	0	0	0.0329313	1.45309	0.0804505	0.099734	0.524643	0.171876	1.79868	0.341274	0.122394
k__Bacteria;p__Firmicutes;c__Negativicutes;o__Veillonellales-Selenomonadales;f__Veillonellaceae;g__Veillonella;s__parvula		0.393574	12.2735	5.75124	11.3618	6.41072	10.084	11.7917	5.67983	2.89063	3.12858	1.29253	11.6947	5.96457	1.03245	35.9707	18.4142	7.56254	2.08514	3.0447	24.1788

## Sheet: Tongue Species
		Trained										Untrained
	Participant ID	1	3	8	9	19	20	21	22	24	27	11	13	14	15	16	17	23	30	31	32
Species
k__Bacteria;p__Actinobacteriota;c__Actinobacteria;o__Actinomycetales;f__Actinomycetaceae;g__Actinomyces;s__graevenitzii		0	0	0	0	0	0	0	0	0	0	0	0	0	0	0	0	0	0	0	0
k__Bacteria;p__Actinobacteriota;c__Actinobacteria;o__Actinomycetales;f__Actinomycetaceae;g__Actinomyces;s__NA		0.544554	0.519873	2.55395	0	1.73799	3.20669	0.467214	0.912033	0.957396	3.25454	2.27061	0.564529	0	0.143318	2.63423	0	0.703198	1.4848	2.68019	8.42467
k__Bacteria;p__Actinobacteriota;c__Actinobacteria;o__Actinomycetales;f__Actinomycetaceae;g__Actinomyces;s__pacaensis		0	0	0	0	0	0	0	0	0	0	0	0	0	0	0	0	0	0	0	0
k__Bacteria;p__Actinobacteriota;c__Actinobacteria;o__Micrococcales;f__Micrococcaceae;g__Rothia;s__mucilaginosa		0	0	0	0.140845	0	0	0	0.176523	0	0	0	0	0	0	0	0.148566	0	0	0	0
k__Bacteria;p__Actinobacteriota;c__Coriobacteriia;o__Coriobacteriales;f__Atopobiaceae;g__Atopobium;s__NA		0	0	0	0.100604	0	0	0.322217	0	0	0	0	0	0	0	0.100929	0.579409	0.0530715	0	0	0.0644745
k__Bacteria;p__Bacteroidota;c__Bacteroidia;o__Bacteroidales;f__Porphyromonadaceae;g__Porphyromonas;s__NA		11.7327	0.704343	0	1.14688	4.98972	23.934	16.5458	1.4416	9.23887	0	5.59876	3.24604	12.2269	10.0322	0	0	25.8458	0	9.19957	0
k__Bacteria;p__Bacteroidota;c__Bacteroidia;o__Bacteroidales;f__Prevotellaceae;g__Alloprevotella;s__NA		1.13861	3.73973	0.554346	0.764588	0	0.0464738	0.338328	0	0.622307	0.308325	0	0.0392034	0	0.501612	0	0.415986	0	0	0	0
k__Bacteria;p__Bacteroidota;c__Bacteroidia;o__Bacteroidales;f__Prevotellaceae;g__Alloprevotella;s__rava		0	0.402482	0	0	0.280321	0	0	0	0	0	0	0	1.72269	0	0	0	0	0.188546	0	0
k__Bacteria;p__Bacteroidota;c__Bacteroidia;o__Bacteroidales;f__Prevotellaceae;g__Prevotella;s__histicola		0	0	0	0	0	0	0.57999	0	0	0	0.342146	0	0	0	0.292693	4.27871	0	0	0	0
k__Bacteria;p__Bacteroidota;c__Bacteroidia;o__Bacteroidales;f__Prevotellaceae;g__Prevotella;s__jejuni		0	0	0	0	0	0	0	0	0	0	0	0	0	0	0	0	0	0	0	0
k__Bacteria;p__Bacteroidota;c__Bacteroidia;o__Bacteroidales;f__Prevotellaceae;g__Prevotella;s__melaninogenica		2.32673	3.52172	0	1.46881	0.112129	1.09213	3.62494	0	2.87219	0.548133	0.808709	3.08139	6.84874	4.51451	6.82277	1.44109	5.24081	0.636342	0	0
k__Bacteria;p__Bacteroidota;c__Bacteroidia;o__Bacteroidales;f__Prevotellaceae;g__Prevotella;s__NA		0	2.48197	0.237577	2.31388	2.52289	0.0580922	0.434993	5.9135	11.2015	0	0	0.023522	5.79832	1.11071	0.252321	0.193136	2.229	16.4271	1.08656	0
k__Bacteria;p__Bacteroidota;c__Bacteroidia;o__Bacteroidales;f__Prevotellaceae;g__Prevotella;s__nanceiensis		0.29703	0	0	0	0.149505	0	0	0	0	0	0	0	0.12605	0	0	0	0	0	0	0
k__Bacteria;p__Bacteroidota;c__Bacteroidia;o__Bacteroidales;f__Prevotellaceae;g__Prevotella;s__oulorum		0	0.150931	2.93011	1.97183	0.859652	0.0348554	1.43386	1.08856	5.31355	0	0	3.55183	0.672269	0	0.403714	1.02511	1.95038	4.43083	1.41253	0
k__Bacteria;p__Bacteroidota;c__Bacteroidia;o__Bacteroidales;f__Prevotellaceae;g__Prevotella;s__pallens		0	0	0	0	0	0.0929476	4.22104	0	0	0	0	0	3.86555	0	0	0	0	0	0	0
k__Bacteria;p__Bacteroidota;c__Bacteroidia;o__Bacteroidales;f__Prevotellaceae;g__Prevotella;s__salivae		0	0	0.791922	0	0.0747524	0	0.596101	0.647249	0	0	0	0	0.420168	0	6.26766	0.430842	0	0.164978	0.470844	0
k__Bacteria;p__Campylobacterota;c__Campylobacteria;o__Campylobacterales;f__Campylobacteraceae;g__Campylobacter;s__concisus		5.74257	2.90122	0.0593942	24.7082	10.0168	0.243987	0.644434	0.500147	7.32408	0.20555	5.00778	4.31237	4.66387	4.44285	0.888171	3.75873	1.51254	0	3.22347	0.505051
k__Bacteria;p__Campylobacterota;c__Campylobacteria;o__Campylobacterales;f__Campylobacteraceae;g__Campylobacter;s__NA		0	0	0	0.140845	0	0	0	0	0	0	0	0	0	0.214977	0	0	0	0	0	0
k__Bacteria;p__Firmicutes;c__Bacilli;o__Erysipelotrichales;f__Erysipelotrichaceae;g__Solobacterium;s__moorei		0	0	0	0.120724	0	0	0	0.941453	0	0	0	0.109769	0.546218	0	0	0.0891398	0	0.542069	2.02825	0
k__Bacteria;p__Firmicutes;c__Bacilli;o__Lactobacillales;f__Carnobacteriaceae;g__Granulicatella;s__NA		0.693069	0	0	0	1.49505	0	0	0.588408	1.53183	0	1.80404	1.07417	0	0.859907	0.201857	0.267419	1.00836	0	0	0.730711
k__Bacteria;p__Firmicutes;c__Bacilli;o__Lactobacillales;f__Streptococcaceae;g__Streptococcus;s__infantis		0	0	0	0	0	0	0	0	0	0	0	0	0	0	0	0	0	0	0.470844	0
k__Bacteria;p__Firmicutes;c__Bacilli;o__Lactobacillales;f__Streptococcaceae;g__Streptococcus;s__NA		12.1782	0.452792	1.76203	2.11268	0.224257	0	0	1.52986	0	0	3.95023	8.21703	2.05882	0	2.72507	1.32224	1.02163	1.41409	2.8975	8.51064
k__Bacteria;p__Firmicutes;c__Bacilli;o__Lactobacillales;f__Streptococcaceae;g__Streptococcus;s__oralis		3.9604	2.54905	3.00931	5.01006	3.83106	9.72464	1.12776	2.26537	1.29248	2.63789	3.23484	14.615	2.47899	0.967395	10.8902	1.73823	0.411304	0	0	6.11433
k__Bacteria;p__Firmicutes;c__Bacilli;o__Lactobacillales;f__Streptococcaceae;g__Streptococcus;s__parasanguinis		0	0	0	0	0	0	0	0	0	0	0.217729	0	0	0	1.12031	0.0891398	0	0	0	0
k__Bacteria;p__Firmicutes;c__Bacilli;o__Lactobacillales;f__Streptococcaceae;g__Streptococcus;s__salivarius		0	0	0	0	0	0	0	0	0	0	0	0.172495	0	0	0	0	0	0	0	0
k__Bacteria;p__Firmicutes;c__Bacilli;o__Staphylococcales;f__Gemellaceae;g__Gemella;s__NA		0	0	0	0	0	0	0	0	0	0	0	0	0	0	0	0	0.583787	0	0	0
k__Bacteria;p__Firmicutes;c__Clostridia;o__Clostridia UCG-014;f__NA;g__NA;s__NA		0	0	0	2.59557	1.1026	0.0929476	1.27276	0.558988	7.94639	0	0	0	5.21008	2.29308	0.35325	0	9.0885	0	0	0
k__Bacteria;p__Firmicutes;c__Clostridia;o__Lachnospirales;f__Lachnospiraceae;g__Catonella;s__NA		1.83168	1.25776	0	0.241449	0	0.0232369	0	0	0	0	0.0622084	0.180336	0.504202	0.358295	0	0.0594265	0.159215	0.447796	0.253531	0
k__Bacteria;p__Firmicutes;c__Clostridia;o__Lachnospirales;f__Lachnospiraceae;g__Lachnoanaerobaculum;s__NA		0.148515	0.721114	0.336567	3.11871	1.7193	1.03404	0.628323	2.00059	1.67544	0	0	1.41132	4.2437	0.64493	0.302786	0.207993	1.14104	2.40396	1.95581	1.91274
k__Bacteria;p__Firmicutes;c__Clostridia;o__Lachnospirales;f__Lachnospiraceae;g__NA;s__NA		0.29703	0	0	0	0	0	0	0	0	0	0	0	0.294118	0	0	0	0	0	0	0
k__Bacteria;p__Firmicutes;c__Clostridia;o__Lachnospirales;f__Lachnospiraceae;g__Oribacterium;s__asaccharolyticum		0	0	0	0	0	0	0	0	0	0	0	0	0	0	0	0	0	0	0	0
k__Bacteria;p__Firmicutes;c__Clostridia;o__Lachnospirales;f__Lachnospiraceae;g__Oribacterium;s__NA		0	0.218011	0.118788	0	0.224257	0	0.306106	1.23566	0	0	0	0	0.672269	0	0.171579	0	0.0796073	0.117841	0	0.0537288
k__Bacteria;p__Firmicutes;c__Clostridia;o__Lachnospirales;f__Lachnospiraceae;g__Oribacterium;s__sinus		0	0	0	0	0	0	0	0	0	0	0	0	0	0	0	0	0	0	0	0
k__Bacteria;p__Firmicutes;c__Clostridia;o__Lachnospirales;f__Lachnospiraceae;g__Stomatobaculum;s__NA		0	0	0	0.342052	0	0	0.75721	0.470727	0.718047	0	0	0	0	0	0.0302786	0	0.384768	0	0	0
k__Bacteria;p__Firmicutes;c__Clostridia;o__Peptostreptococcales-Tissierellales;f__Anaerovoracaceae;g__[Eubacterium] nodatum group;s__sulci		0	0	0	0	0	0	0	0	0	0	0	0	0	0	0	0	0	0	0	0
k__Bacteria;p__Firmicutes;c__Clostridia;o__Peptostreptococcales-Tissierellales;f__Anaerovoracaceae;g__Mogibacterium;s__diversum		0	0	0	0	0	0	0	0.176523	0	0	0	0	0	0	0	0	0	0.117841	0	0
k__Bacteria;p__Firmicutes;c__Clostridia;o__Peptostreptococcales-Tissierellales;f__Peptostreptococcaceae;g__Peptostreptococcus;s__stomatis		0	0	0	0	0	0	0	0	0	0	0	0	0	0.429953	0	0	0	0	0.760594	0
k__Bacteria;p__Firmicutes;c__Negativicutes;o__Veillonellales-Selenomonadales;f__Selenomonadaceae;g__Selenomonas;s__NA		25.5941	1.1236	0.138586	3.38028	0.39245	0.127803	0.289995	10.0618	5.88798	0	7.02955	3.05786	1.97479	0	2.1195	0	0.915484	10.7707	3.36834	0.139695
k__Bacteria;p__Firmicutes;c__Negativicutes;o__Veillonellales-Selenomonadales;f__Veillonellaceae;g__Veillonella;s__atypica		0	0	0	0	0	0	0.724988	0	0	0	0	0	0	0	9.23496	0	0	0	0	0
k__Bacteria;p__Firmicutes;c__Negativicutes;o__Veillonellales-Selenomonadales;f__Veillonellaceae;g__Veillonella;s__dispar		0	0	0	0	0	0	0	0	0	0	0	0.101929	0	0	0	0	0	0	0	0
k__Bacteria;p__Firmicutes;c__Negativicutes;o__Veillonellales-Selenomonadales;f__Veillonellaceae;g__Veillonella;s__NA		1.83168	1.24099	0	0	0	0	0	0	0	0	0	0	0	0	0	0	0	0	0	0
k__Bacteria;p__Firmicutes;c__Negativicutes;o__Veillonellales-Selenomonadales;f__Veillonellaceae;g__Veillonella;s__parvula		2.42574	33.9594	14.9673	35.9759	20.0336	17.1488	20.2513	24.8014	12.1589	14.0459	9.14463	22.2754	18.1092	2.75887	43.6819	37.0227	15.7622	7.37686	16.4795	65.807
k__Bacteria;p__Fusobacteriota;c__Fusobacteriia;o__Fusobacteriales;f__Fusobacteriaceae;g__Fusobacterium;s__periodonticum		0	3.57203	0.356365	0.201207	0	0.592541	2.5294	0	0	0	0	0	0	0	0	0	0.597055	0	1.159	0
k__Bacteria;p__Fusobacteriota;c__Fusobacteriia;o__Fusobacteriales;f__Leptotrichiaceae;g__Leptotrichia;s__NA		8.86139	7.14406	2.17779	2.01207	7.0641	4.10131	2.98051	3.35393	6.46242	40.3563	51.0731	0.203858	10.9244	4.72949	3.8151	1.2331	2.50763	8.69668	35.4219	3.26671
k__Bacteria;p__Fusobacteriota;c__Fusobacteriia;o__Fusobacteriales;f__Leptotrichiaceae;g__Leptotrichia;s__wadei		1.88119	0	0.296971	4.82897	5.3448	0.0464738	4.36604	7.85525	9.38248	0	0	7.51921	2.98319	0	4.73355	1.47081	9.36712	17.7233	1.05034	0
k__Bacteria;p__Patescibacteria;c__Saccharimonadia;o__Saccharimonadales;f__NA;g__NA;s__NA		0	1.67701	0	0	0	0	0.38666	28.7143	9.81331	0	1.95956	0	4.15966	0.0716589	0	0	3.74154	10.1579	0.325969	0.0322373
k__Bacteria;p__Patescibacteria;c__Saccharimonadia;o__Saccharimonadales;f__Saccharimonadaceae;g__Candidatus Saccharimonas;s__NA		0	0	0	0.201207	2.27995	0.0464738	0.0966651	1.52986	3.92532	0	6.56299	0	3.31933	0.716589	0	0	2.90567	0	0	0
k__Bacteria;p__Patescibacteria;c__Saccharimonadia;o__Saccharimonadales;f__Saccharimonadaceae;g__TM7x;s__NA		1.93069	0.134161	0	1.60966	0.130817	0.0464738	0	0.73551	0	0	0.839813	0.360671	2.56303	0	0.171579	0.430842	0.0530715	0.235682	1.159	1.46142
k__Bacteria;p__Proteobacteria;c__Gammaproteobacteria;o__Burkholderiales;f__Neisseriaceae;g__Neisseria;s__NA		4.75248	0	62.9776	0	16.7632	0.45312	0	0.970874	0.718047	12.333	0	0	2.85714	20.6378	0.35325	0	2.49436	0	4.27381	0
k__Bacteria;p__Proteobacteria;c__Gammaproteobacteria;o__Burkholderiales;f__Neisseriaceae;g__Neisseria;s__subflava		0.445545	0	3.12809	5.49296	13.9226	0	30.9812	0.235363	0.574438	1.06201	0.0933126	0.0705661	0	44.5718	0	39.5186	7.2708	0	0.325969	0
k__Bacteria;p__Proteobacteria;c__Gammaproteobacteria;o__Enterobacterales;f__Pasteurellaceae;g__Haemophilus;s__parainfluenzae		11.3861	31.5278	3.60325	0	4.72809	37.8529	4.09215	1.2945	0.382958	25.2484	0	25.8115	0.756303	0	2.43238	4.27871	2.972	16.6627	9.99638	2.97657

## Sheet: Wilcoxon Plaque Genus
Genus	p.value	adj.p.value	mean1	mean2	log2FC
k__Bacteria;p__Proteobacteria;c__Gammaproteobacteria;o__Enterobacterales;f__Pasteurellaceae;g__Aggregatibacter	0.0524259	0.983781	5.47787	4.22278	0.283603
k__Bacteria;p__Patescibacteria;c__Saccharimonadia;o__Saccharimonadales;f__Saccharimonadaceae;g__NA	0.0892096	0.983781	4.50492	5.33183	-0.184545
k__Bacteria;p__Patescibacteria;c__Saccharimonadia;o__Saccharimonadales;f__Saccharimonadaceae;g__TM7x	0.217563	0.983781	2.59271	3.5727	-0.306007
k__Bacteria;p__Fusobacteriota;c__Fusobacteriia;o__Fusobacteriales;f__Leptotrichiaceae;g__Leptotrichia	0.247451	0.983781	7.14779	7.26843	-0.0198628
k__Bacteria;p__Proteobacteria;c__Gammaproteobacteria;o__Burkholderiales;f__Neisseriaceae;g__Eikenella	0.247451	0.983781	5.00693	4.07635	0.220644
k__Bacteria;p__Proteobacteria;c__Gammaproteobacteria;o__Burkholderiales;f__Neisseriaceae;g__Kingella	0.279861	0.983781	6.14303	5.02036	0.227424
k__Bacteria;p__Proteobacteria;c__Gammaproteobacteria;o__Cardiobacteriales;f__Cardiobacteriaceae;g__Cardiobacterium	0.314999	0.983781	4.85848	5.66264	-0.170425
k__Bacteria;p__Firmicutes;c__Bacilli;o__Staphylococcales;f__Gemellaceae;g__Gemella	0.314999	0.983781	2.7311	3.67796	-0.287971
k__Bacteria;p__Firmicutes;c__Clostridia;o__Lachnospirales;f__Lachnospiraceae;g__Catonella	0.314999	0.983781	2.03314	2.41912	-0.147404
k__Bacteria;p__Firmicutes;c__Clostridia;o__Clostridia UCG-014;f__NA;g__NA	0.352681	0.983781	3.23544	2.48192	0.246911
k__Bacteria;p__Firmicutes;c__Clostridia;o__Lachnospirales;f__Lachnospiraceae;g__Johnsonella	0.352681	0.983781	3.28592	2.34259	0.312707
k__Bacteria;p__Bacteroidota;c__Bacteroidia;o__Flavobacteriales;f__Flavobacteriaceae;g__Capnocytophaga	0.393048	0.983781	8.36603	7.96332	0.0597841
k__Bacteria;p__Firmicutes;c__Clostridia;o__Lachnospirales;f__Lachnospiraceae;g__Oribacterium	0.393048	0.983781	2.26064	1.69551	0.231267
k__Bacteria;p__Firmicutes;c__Bacilli;o__Erysipelotrichales;f__Erysipelotrichaceae;g__Solobacterium	0.393048	0.983781	1.41419	2.02162	-0.268538
k__Bacteria;p__Campylobacterota;c__Campylobacteria;o__Campylobacterales;f__Campylobacteraceae;g__Campylobacter	0.435872	0.983781	7.08317	7.30796	-0.0370639
k__Bacteria;p__Bacteroidota;c__Bacteroidia;o__Bacteroidales;f__Prevotellaceae;g__Alloprevotella	0.435872	0.983781	3.73171	3.07314	0.191944
k__Bacteria;p__Proteobacteria;c__Gammaproteobacteria;o__Burkholderiales;f__Neisseriaceae;g__Neisseria	0.481251	0.983781	7.17272	6.10152	0.188919
k__Bacteria;p__Firmicutes;c__Negativicutes;o__Veillonellales-Selenomonadales;f__Veillonellaceae;g__Dialister	0.528849	0.983781	3.32861	2.70448	0.197276
k__Bacteria;p__Patescibacteria;c__Saccharimonadia;o__Saccharimonadales;f__Saccharimonadaceae;g__Candidatus Saccharimonas	0.528849	0.983781	2.78541	2.38789	0.138584
k__Bacteria;p__Firmicutes;c__Negativicutes;o__Veillonellales-Selenomonadales;f__Selenomonadaceae;g__Selenomonas	0.578742	0.983781	6.33183	6.69825	-0.0655179
k__Bacteria;p__Actinobacteriota;c__Actinobacteria;o__Actinomycetales;f__Actinomycetaceae;g__Actinomyces	0.578742	0.983781	5.91353	5.04924	0.177436
k__Bacteria;p__Patescibacteria;c__Saccharimonadia;o__Saccharimonadales;f__NA;g__NA	0.578742	0.983781	2.87459	3.09675	-0.0706037
k__Bacteria;p__Proteobacteria;c__Gammaproteobacteria;o__Enterobacterales;f__Pasteurellaceae;g__Haemophilus	0.630529	0.983781	5.87528	5.29755	0.116777
k__Bacteria;p__Spirochaetota;c__Spirochaetia;o__Spirochaetales;f__Spirochaetaceae;g__Treponema	0.630529	0.983781	3.69002	4.28343	-0.154637
k__Bacteria;p__Actinobacteriota;c__Actinobacteria;o__Propionibacteriales;f__Propionibacteriaceae;g__Pseudopropionibacterium	0.630529	0.983781	2.23605	2.90052	-0.233005
k__Bacteria;p__Fusobacteriota;c__Fusobacteriia;o__Fusobacteriales;f__Fusobacteriaceae;g__Fusobacterium	0.684211	0.983781	7.45934	7.36869	0.0145823
k__Bacteria;p__Bacteroidota;c__Bacteroidia;o__Flavobacteriales;f__Weeksellaceae;g__Bergeyella	0.684211	0.983781	4.50777	4.36472	0.0344485
k__Bacteria;p__Bacteroidota;c__Bacteroidia;o__Bacteroidales;f__Tannerellaceae;g__Tannerella	0.795936	0.983781	4.89524	4.95182	-0.0126004
k__Bacteria;p__Firmicutes;c__Negativicutes;o__Veillonellales-Selenomonadales;f__Selenomonadaceae;g__Centipeda	0.795936	0.983781	4.15315	3.61648	0.142449
k__Bacteria;p__Proteobacteria;c__Gammaproteobacteria;o__Burkholderiales;f__Burkholderiaceae;g__Lautropia	0.795936	0.983781	4.0166	4.0983	-0.0210011
k__Bacteria;p__Actinobacteriota;c__Actinobacteria;o__Corynebacteriales;f__Corynebacteriaceae;g__Corynebacterium	0.853428	0.983781	6.5178	6.65409	-0.0241544
k__Bacteria;p__Patescibacteria;c__Saccharimonadia;o__Saccharimonadales;f__Saccharimonadaceae;g__TM7a	0.853428	0.983781	4.30654	4.7917	-0.11473
k__Bacteria;p__Actinobacteriota;c__Actinobacteria;o__Actinomycetales;f__Actinomycetaceae;g__F0332	0.853428	0.983781	2.62124	2.58634	0.0121076
k__Bacteria;p__Bacteroidota;c__Bacteroidia;o__Bacteroidales;f__Prevotellaceae;g__Prevotella	0.911797	0.983781	7.64829	7.89792	-0.0386115
k__Bacteria;p__Firmicutes;c__Negativicutes;o__Veillonellales-Selenomonadales;f__Veillonellaceae;g__Veillonella	0.911797	0.983781	7.46803	7.383	0.0136603
k__Bacteria;p__Firmicutes;c__Bacilli;o__Lactobacillales;f__Streptococcaceae;g__Streptococcus	0.911797	0.983781	6.83405	6.7969	0.00640299
k__Bacteria;p__Bacteroidota;c__Bacteroidia;o__Bacteroidales;f__Porphyromonadaceae;g__Porphyromonas	0.911797	0.983781	5.82119	5.49642	0.0649633
k__Bacteria;p__Firmicutes;c__Negativicutes;o__Veillonellales-Selenomonadales;f__Selenomonadaceae;g__NA	0.911797	0.983781	3.19298	3.31592	-0.0368825
k__Bacteria;p__Actinobacteriota;c__Actinobacteria;o__Micrococcales;f__Micrococcaceae;g__Rothia	0.970512	0.994775	6.05043	5.47749	0.112998
k__Bacteria;p__Firmicutes;c__Bacilli;o__Lactobacillales;f__Carnobacteriaceae;g__Granulicatella	0.970512	0.994775	3.73591	3.33828	0.112717
k__Bacteria;p__Firmicutes;c__Clostridia;o__Lachnospirales;f__Lachnospiraceae;g__Lachnoanaerobaculum	1	1	4.29498	4.29074	0.00104631

## Sheet: Wilcox Tongue Genus
Genus	p.value	adj.p.value	mean1	mean2	log2FC
k__Bacteria;p__Actinobacteriota;c__Actinobacteria;o__Micrococcales;f__Micrococcaceae;g__Rothia	0.00519604	0.0684146	7.24463	5.51265	0.298873
k__Bacteria;p__Bacteroidota;c__Bacteroidia;o__Bacteroidales;f__Porphyromonadaceae;g__Porphyromonas	0.00684146	0.0684146	5.35692	2.79372	0.616731
k__Bacteria;p__Firmicutes;c__Bacilli;o__Staphylococcales;f__Gemellaceae;g__Gemella	0.00684146	0.0684146	5.16755	2.91017	0.544625
k__Bacteria;p__Firmicutes;c__Bacilli;o__Lactobacillales;f__Streptococcaceae;g__Streptococcus	0.0185434	0.11126	8.70048	7.46724	0.176455
k__Bacteria;p__Firmicutes;c__Bacilli;o__Lactobacillales;f__Carnobacteriaceae;g__Granulicatella	0.0185434	0.11126	6.62881	5.08928	0.283097
k__Bacteria;p__Firmicutes;c__Clostridia;o__Lachnospirales;f__Lachnospiraceae;g__Stomatobaculum	0.035463	0.177315	5.53893	4.49125	0.215503
k__Bacteria;p__Actinobacteriota;c__Actinobacteria;o__Actinomycetales;f__Actinomycetaceae;g__Actinomyces	0.0630128	0.236298	6.05615	5.43492	0.115599
k__Bacteria;p__Firmicutes;c__Clostridia;o__Lachnospirales;f__Lachnospiraceae;g__NA	0.0630128	0.236298	3.08304	1.83383	0.405828
k__Bacteria;p__Bacteroidota;c__Bacteroidia;o__Flavobacteriales;f__Flavobacteriaceae;g__Capnocytophaga	0.0892096	0.297365	3.15019	1.99797	0.364417
k__Bacteria;p__Campylobacterota;c__Campylobacteria;o__Campylobacterales;f__Campylobacteraceae;g__Campylobacter	0.123005	0.369016	4.97851	5.77726	-0.156095
k__Bacteria;p__Firmicutes;c__Clostridia;o__Lachnospirales;f__Lachnospiraceae;g__Oribacterium	0.190316	0.519043	5.41495	4.98445	0.0861511
k__Bacteria;p__Proteobacteria;c__Gammaproteobacteria;o__Burkholderiales;f__Neisseriaceae;g__Neisseria	0.217563	0.543907	5.33122	4.52837	0.167046
k__Bacteria;p__Bacteroidota;c__Bacteroidia;o__Bacteroidales;f__Prevotellaceae;g__Alloprevotella	0.247451	0.57104	5.70529	6.58367	-0.155522
k__Bacteria;p__Proteobacteria;c__Gammaproteobacteria;o__Enterobacterales;f__Pasteurellaceae;g__Haemophilus	0.352681	0.661278	6.72903	6.10434	0.106978
k__Bacteria;p__Patescibacteria;c__Saccharimonadia;o__Saccharimonadales;f__Saccharimonadaceae;g__Candidatus Saccharimonas	0.352681	0.661278	3.02423	3.67728	-0.175912
k__Bacteria;p__Firmicutes;c__Clostridia;o__Lachnospirales;f__Lachnospiraceae;g__Catonella	0.352681	0.661278	2.78968	3.22636	-0.125586
k__Bacteria;p__Firmicutes;c__Clostridia;o__Clostridia UCG-014;f__NA;g__NA	0.528849	0.933263	3.78814	3.74095	0.0117872
k__Bacteria;p__Firmicutes;c__Clostridia;o__Peptostreptococcales-Tissierellales;f__Peptostreptococcaceae;g__Peptostreptococcus	0.630529	0.984725	4.62389	4.97803	-0.075013
k__Bacteria;p__Fusobacteriota;c__Fusobacteriia;o__Fusobacteriales;f__Fusobacteriaceae;g__Fusobacterium	0.684211	0.984725	5.4574	5.70654	-0.0473373
k__Bacteria;p__Firmicutes;c__Clostridia;o__Peptostreptococcales-Tissierellales;f__Anaerovoracaceae;g__Mogibacterium	0.684211	0.984725	3.48148	3.22592	0.0687291
k__Bacteria;p__Actinobacteriota;c__Coriobacteriia;o__Coriobacteriales;f__Atopobiaceae;g__Atopobium	0.739364	0.984725	4.94147	5.27384	-0.0673649
k__Bacteria;p__Firmicutes;c__Clostridia;o__Lachnospirales;f__Lachnospiraceae;g__Lachnoanaerobaculum	0.739364	0.984725	4.4584	4.54131	-0.0183692
k__Bacteria;p__Firmicutes;c__Negativicutes;o__Veillonellales-Selenomonadales;f__Veillonellaceae;g__Veillonella	0.795936	0.984725	7.69799	7.89508	-0.028991
k__Bacteria;p__Fusobacteriota;c__Fusobacteriia;o__Fusobacteriales;f__Leptotrichiaceae;g__Leptotrichia	0.853428	0.984725	5.82528	5.68709	0.0256653
k__Bacteria;p__Patescibacteria;c__Saccharimonadia;o__Saccharimonadales;f__Saccharimonadaceae;g__TM7x	0.853428	0.984725	5.03943	5.65528	-0.120803
k__Bacteria;p__Firmicutes;c__Bacilli;o__Erysipelotrichales;f__Erysipelotrichaceae;g__Solobacterium	0.853428	0.984725	5.07631	5.24852	-0.0346328
k__Bacteria;p__Firmicutes;c__Clostridia;o__Peptostreptococcales-Tissierellales;f__Anaerovoracaceae;g__[Eubacterium] nodatum group	0.911797	1	4.07676	4.51784	-0.100904
k__Bacteria;p__Bacteroidota;c__Bacteroidia;o__Bacteroidales;f__Prevotellaceae;g__Prevotella	0.970512	1	8.6627	8.68812	-0.00343127
k__Bacteria;p__Patescibacteria;c__Saccharimonadia;o__Saccharimonadales;f__NA;g__NA	0.970512	1	2.18957	2.08642	0.0358633
k__Bacteria;p__Firmicutes;c__Negativicutes;o__Veillonellales-Selenomonadales;f__Selenomonadaceae;g__Selenomonas	1	1	2.75832	2.84918	-0.0272216

## Sheet: Wilcox Plaque Species
Species	p.value	adj.p.value	mean1	mean2	log2FC
k__Bacteria;p__Bacteroidota;c__Bacteroidia;o__Bacteroidales;f__Prevotellaceae;g__Alloprevotella;s__NA	0.0288056	0.912211	3.29799	1.35179	0.821537
k__Bacteria;p__Proteobacteria;c__Gammaproteobacteria;o__Enterobacterales;f__Pasteurellaceae;g__Aggregatibacter;s__segnis	0.0432571	0.912211	2.52376	1.24796	0.608296
k__Bacteria;p__Bacteroidota;c__Bacteroidia;o__Flavobacteriales;f__Flavobacteriaceae;g__Capnocytophaga;s__gingivalis	0.0524259	0.912211	6.33638	5.10523	0.257896
k__Bacteria;p__Proteobacteria;c__Gammaproteobacteria;o__Burkholderiales;f__Neisseriaceae;g__Neisseria;s__bacilliformis	0.0524259	0.912211	3.5777	1.76754	0.689887
k__Bacteria;p__Fusobacteriota;c__Fusobacteriia;o__Fusobacteriales;f__Leptotrichiaceae;g__Leptotrichia;s__goodfellowii	0.0524259	0.912211	2.2032	1.05336	0.598147
k__Bacteria;p__Firmicutes;c__Bacilli;o__Lactobacillales;f__Streptococcaceae;g__Streptococcus;s__NA	0.0892096	0.974617	3.22573	5.10103	-0.511165
k__Bacteria;p__Proteobacteria;c__Gammaproteobacteria;o__Burkholderiales;f__Neisseriaceae;g__Kingella;s__NA	0.105122	0.974617	5.18189	3.32305	0.498115
k__Bacteria;p__Bacteroidota;c__Bacteroidia;o__Flavobacteriales;f__Flavobacteriaceae;g__Capnocytophaga;s__granulosa	0.123005	0.974617	6.67886	5.44169	0.24696
k__Bacteria;p__Fusobacteriota;c__Fusobacteriia;o__Fusobacteriales;f__Fusobacteriaceae;g__Fusobacterium;s__periodonticum	0.123005	0.974617	2.74393	1.2976	0.662359
k__Bacteria;p__Patescibacteria;c__Saccharimonadia;o__Saccharimonadales;f__Saccharimonadaceae;g__NA;s__NA	0.123005	0.974617	4.40669	5.32671	-0.219764
k__Bacteria;p__Firmicutes;c__Bacilli;o__Lactobacillales;f__Carnobacteriaceae;g__Granulicatella;s__adiacens	0.14314	0.974617	2.63948	1.5678	0.474414
k__Bacteria;p__Proteobacteria;c__Gammaproteobacteria;o__Burkholderiales;f__Neisseriaceae;g__Neisseria;s__mucosa	0.165494	0.974617	4.29452	2.36733	0.625331
k__Bacteria;p__Proteobacteria;c__Gammaproteobacteria;o__Enterobacterales;f__Pasteurellaceae;g__Aggregatibacter;s__NA	0.190316	0.974617	5.1491	3.58141	0.41026
k__Bacteria;p__Bacteroidota;c__Bacteroidia;o__Bacteroidales;f__Prevotellaceae;g__Prevotella;s__denticola	0.190316	0.974617	3.47979	2.27827	0.429714
k__Bacteria;p__Proteobacteria;c__Gammaproteobacteria;o__Burkholderiales;f__Neisseriaceae;g__Neisseria;s__oralis	0.190316	0.974617	2.78374	1.7002	0.460055
k__Bacteria;p__Patescibacteria;c__Saccharimonadia;o__Saccharimonadales;f__Saccharimonadaceae;g__TM7x;s__NA	0.217563	0.974617	2.49447	3.56757	-0.36924
k__Bacteria;p__Firmicutes;c__Bacilli;o__Lactobacillales;f__Streptococcaceae;g__Streptococcus;s__gordonii	0.247451	0.974617	3.3994	2.34586	0.376747
k__Bacteria;p__Firmicutes;c__Bacilli;o__Erysipelotrichales;f__Erysipelotrichaceae;g__Solobacterium;s__moorei	0.247451	0.974617	1.31596	2.0165	-0.356308
k__Bacteria;p__Firmicutes;c__Clostridia;o__Lachnospirales;f__Lachnospiraceae;g__Catonella;s__NA	0.247451	0.974617	1.93491	2.41399	-0.206111
k__Bacteria;p__Firmicutes;c__Bacilli;o__Staphylococcales;f__Gemellaceae;g__Gemella;s__morbillorum	0.279861	0.974617	2.56355	3.51093	-0.325103
k__Bacteria;p__Firmicutes;c__Clostridia;o__Lachnospirales;f__Lachnospiraceae;g__Johnsonella;s__NA	0.279861	0.974617	2.82659	1.89681	0.380431
k__Bacteria;p__Bacteroidota;c__Bacteroidia;o__Bacteroidales;f__Prevotellaceae;g__Prevotella;s__oris	0.314999	0.974617	4.16792	5.20651	-0.255847
k__Bacteria;p__Bacteroidota;c__Bacteroidia;o__Bacteroidales;f__Prevotellaceae;g__Prevotella;s__saccharolytica	0.314999	0.974617	2.86808	2.34514	0.199313
k__Bacteria;p__Actinobacteriota;c__Actinobacteria;o__Actinomycetales;f__Actinomycetaceae;g__Actinomyces;s__oris	0.352681	0.974617	4.13548	3.13488	0.300586
k__Bacteria;p__Proteobacteria;c__Gammaproteobacteria;o__Burkholderiales;f__Neisseriaceae;g__Neisseria;s__subflava	0.393048	0.974617	4.31066	3.29637	0.294371
k__Bacteria;p__Proteobacteria;c__Gammaproteobacteria;o__Burkholderiales;f__Neisseriaceae;g__Kingella;s__oralis	0.393048	0.974617	2.74793	2.54951	0.0746954
k__Bacteria;p__Proteobacteria;c__Gammaproteobacteria;o__Burkholderiales;f__Burkholderiaceae;g__Lautropia;s__mirabilis	0.393048	0.974617	3.01316	2.30655	0.265916
k__Bacteria;p__Firmicutes;c__Bacilli;o__Lactobacillales;f__Carnobacteriaceae;g__Granulicatella;s__NA	0.393048	0.974617	2.13607	3.24414	-0.415414
k__Bacteria;p__Bacteroidota;c__Bacteroidia;o__Bacteroidales;f__Prevotellaceae;g__Prevotella;s__melaninogenica	0.435872	0.974617	4.01087	4.52833	-0.136976
k__Bacteria;p__Firmicutes;c__Bacilli;o__Lactobacillales;f__Streptococcaceae;g__Streptococcus;s__oralis	0.435872	0.974617	5.60612	4.68291	0.210812
k__Bacteria;p__Firmicutes;c__Clostridia;o__Clostridia UCG-014;f__NA;g__NA;s__NA	0.435872	0.974617	3.1372	2.47679	0.239237
k__Bacteria;p__Proteobacteria;c__Gammaproteobacteria;o__Burkholderiales;f__Neisseriaceae;g__Eikenella;s__corrodens	0.435872	0.974617	4.32772	3.56864	0.213746
k__Bacteria;p__Proteobacteria;c__Gammaproteobacteria;o__Burkholderiales;f__Neisseriaceae;g__Neisseria;s__NA	0.481251	0.974617	4.3034	2.98472	0.396465
k__Bacteria;p__Fusobacteriota;c__Fusobacteriia;o__Fusobacteriales;f__Fusobacteriaceae;g__Fusobacterium;s__NA	0.481251	0.974617	3.19618	4.38076	-0.345283
k__Bacteria;p__Proteobacteria;c__Gammaproteobacteria;o__Burkholderiales;f__Neisseriaceae;g__Eikenella;s__NA	0.481251	0.974617	2.53249	1.80443	0.31449
k__Bacteria;p__Actinobacteriota;c__Actinobacteria;o__Propionibacteriales;f__Propionibacteriaceae;g__Pseudopropionibacterium;s__NA	0.481251	0.974617	1.84469	2.83604	-0.408435
k__Bacteria;p__Bacteroidota;c__Bacteroidia;o__Flavobacteriales;f__Flavobacteriaceae;g__Capnocytophaga;s__ochracea	0.528849	0.974617	6.42697	6.68426	-0.0479602
k__Bacteria;p__Firmicutes;c__Negativicutes;o__Veillonellales-Selenomonadales;f__Selenomonadaceae;g__Selenomonas;s__noxia	0.528849	0.974617	5.53495	5.98596	-0.093721
k__Bacteria;p__Firmicutes;c__Clostridia;o__Lachnospirales;f__Lachnospiraceae;g__Oribacterium;s__NA	0.528849	0.974617	2.1624	1.69039	0.219311
k__Bacteria;p__Bacteroidota;c__Bacteroidia;o__Bacteroidales;f__Porphyromonadaceae;g__Porphyromonas;s__NA	0.578742	0.974617	5.03483	4.13091	0.226572
k__Bacteria;p__Bacteroidota;c__Bacteroidia;o__Bacteroidales;f__Prevotellaceae;g__Prevotella;s__loescheii	0.578742	0.974617	4.94667	6.20114	-0.268555
k__Bacteria;p__Campylobacterota;c__Campylobacteria;o__Campylobacterales;f__Campylobacteraceae;g__Campylobacter;s__concisus	0.578742	0.974617	4.91025	4.97389	-0.0149857
k__Bacteria;p__Proteobacteria;c__Gammaproteobacteria;o__Cardiobacteriales;f__Cardiobacteriaceae;g__Cardiobacterium;s__NA	0.578742	0.974617	4.45609	4.84973	-0.0973198
k__Bacteria;p__Patescibacteria;c__Saccharimonadia;o__Saccharimonadales;f__Saccharimonadaceae;g__Candidatus Saccharimonas;s__NA	0.578742	0.974617	2.68717	2.38276	0.118136
k__Bacteria;p__Spirochaetota;c__Spirochaetia;o__Spirochaetales;f__Spirochaetaceae;g__Treponema;s__socranskii	0.578742	0.974617	3.10462	3.76503	-0.206604
k__Bacteria;p__Firmicutes;c__Negativicutes;o__Veillonellales-Selenomonadales;f__Selenomonadaceae;g__Selenomonas;s__sputigena	0.578742	0.974617	2.81764	3.18265	-0.125917
k__Bacteria;p__Proteobacteria;c__Gammaproteobacteria;o__Burkholderiales;f__Burkholderiaceae;g__Lautropia;s__NA	0.578742	0.974617	1.9612	2.96169	-0.398385
k__Bacteria;p__Bacteroidota;c__Bacteroidia;o__Bacteroidales;f__Prevotellaceae;g__Prevotella;s__NA	0.630529	0.974617	4.08441	3.64466	0.125729
k__Bacteria;p__Campylobacterota;c__Campylobacteria;o__Campylobacterales;f__Campylobacteraceae;g__Campylobacter;s__showae	0.630529	0.974617	4.78189	5.21936	-0.102081
k__Bacteria;p__Bacteroidota;c__Bacteroidia;o__Bacteroidales;f__Prevotellaceae;g__Prevotella;s__nigrescens	0.630529	0.974617	4.06526	4.32156	-0.0687653
k__Bacteria;p__Fusobacteriota;c__Fusobacteriia;o__Fusobacteriales;f__Leptotrichiaceae;g__Leptotrichia;s__hofstadii	0.630529	0.974617	4.49142	4.40146	0.0230488
k__Bacteria;p__Patescibacteria;c__Saccharimonadia;o__Saccharimonadales;f__NA;g__NA;s__NA	0.630529	0.974617	2.77635	3.09163	-0.110489
k__Bacteria;p__Fusobacteriota;c__Fusobacteriia;o__Fusobacteriales;f__Leptotrichiaceae;g__Leptotrichia;s__NA	0.684211	0.974617	6.20542	6.09415	0.0218855
k__Bacteria;p__Campylobacterota;c__Campylobacteria;o__Campylobacterales;f__Campylobacteraceae;g__Campylobacter;s__gracilis	0.684211	0.974617	6.13292	6.63827	-0.0963426
k__Bacteria;p__Patescibacteria;c__Saccharimonadia;o__Saccharimonadales;f__Saccharimonadaceae;g__TM7a;s__NA	0.684211	0.974617	4.2083	4.78658	-0.146951
k__Bacteria;p__Bacteroidota;c__Bacteroidia;o__Flavobacteriales;f__Flavobacteriaceae;g__Capnocytophaga;s__leadbetteri	0.684211	0.974617	4.6936	4.21672	0.122061
k__Bacteria;p__Bacteroidota;c__Bacteroidia;o__Flavobacteriales;f__Flavobacteriaceae;g__Capnocytophaga;s__sputigena	0.684211	0.974617	4.05362	3.73	0.0920008
k__Bacteria;p__Firmicutes;c__Negativicutes;o__Veillonellales-Selenomonadales;f__Veillonellaceae;g__Dialister;s__invisus	0.684211	0.974617	3.08022	2.44834	0.231346
k__Bacteria;p__Actinobacteriota;c__Actinobacteria;o__Corynebacteriales;f__Corynebacteriaceae;g__Corynebacterium;s__durum	0.684211	0.974617	2.73933	2.63054	0.0405625
k__Bacteria;p__Bacteroidota;c__Bacteroidia;o__Flavobacteriales;f__Flavobacteriaceae;g__Capnocytophaga;s__NA	0.739364	0.974617	5.27234	5.49007	-0.0478437
k__Bacteria;p__Fusobacteriota;c__Fusobacteriia;o__Fusobacteriales;f__Leptotrichiaceae;g__Leptotrichia;s__wadei	0.739364	0.974617	4.3387	4.41386	-0.0194993
k__Bacteria;p__Bacteroidota;c__Bacteroidia;o__Bacteroidales;f__Prevotellaceae;g__Prevotella;s__veroralis	0.739364	0.974617	3.12197	2.31925	0.297592
k__Bacteria;p__Firmicutes;c__Bacilli;o__Lactobacillales;f__Streptococcaceae;g__Streptococcus;s__sanguinis	0.739364	0.974617	3.90199	4.4562	-0.1492
k__Bacteria;p__Bacteroidota;c__Bacteroidia;o__Flavobacteriales;f__Weeksellaceae;g__Bergeyella;s__NA	0.739364	0.974617	4.40953	4.3596	0.0129367
k__Bacteria;p__Proteobacteria;c__Gammaproteobacteria;o__Cardiobacteriales;f__Cardiobacteriaceae;g__Cardiobacterium;s__valvarum	0.739364	0.974617	3.18764	3.71057	-0.162985
k__Bacteria;p__Bacteroidota;c__Bacteroidia;o__Bacteroidales;f__Prevotellaceae;g__Prevotella;s__maculosa	0.739364	0.974617	3.08632	3.07299	0.00450801
k__Bacteria;p__Firmicutes;c__Negativicutes;o__Veillonellales-Selenomonadales;f__Selenomonadaceae;g__Centipeda;s__NA	0.795936	0.976951	4.05491	3.61136	0.127613
k__Bacteria;p__Firmicutes;c__Bacilli;o__Lactobacillales;f__Streptococcaceae;g__Streptococcus;s__mitis	0.795936	0.976951	2.65833	3.04742	-0.139138
k__Bacteria;p__Bacteroidota;c__Bacteroidia;o__Bacteroidales;f__Porphyromonadaceae;g__Porphyromonas;s__catoniae	0.795936	0.976951	2.57466	2.96153	-0.141312
k__Bacteria;p__Actinobacteriota;c__Actinobacteria;o__Actinomycetales;f__Actinomycetaceae;g__F0332;s__NA	0.795936	0.976951	2.523	2.58121	-0.0224736
k__Bacteria;p__Proteobacteria;c__Gammaproteobacteria;o__Enterobacterales;f__Pasteurellaceae;g__Haemophilus;s__parainfluenzae	0.853428	0.976951	5.76842	5.10804	0.143974
k__Bacteria;p__Actinobacteriota;c__Actinobacteria;o__Micrococcales;f__Micrococcaceae;g__Rothia;s__dentocariosa	0.853428	0.976951	5.53158	4.87281	0.148939
k__Bacteria;p__Firmicutes;c__Negativicutes;o__Veillonellales-Selenomonadales;f__Selenomonadaceae;g__Selenomonas;s__NA	0.853428	0.976951	4.45744	4.38253	0.0192836
k__Bacteria;p__Actinobacteriota;c__Actinobacteria;o__Micrococcales;f__Micrococcaceae;g__Rothia;s__aeria	0.853428	0.976951	4.19083	3.50176	0.19791
k__Bacteria;p__Firmicutes;c__Negativicutes;o__Veillonellales-Selenomonadales;f__Selenomonadaceae;g__NA;s__NA	0.853428	0.976951	3.09474	3.3108	-0.0710577
k__Bacteria;p__Firmicutes;c__Bacilli;o__Lactobacillales;f__Streptococcaceae;g__Streptococcus;s__cristatus	0.853428	0.976951	3.44827	3.38791	0.0189194
k__Bacteria;p__Firmicutes;c__Negativicutes;o__Veillonellales-Selenomonadales;f__Veillonellaceae;g__Veillonella;s__parvula	0.911797	0.979338	7.30731	7.35824	-0.00862786
k__Bacteria;p__Firmicutes;c__Clostridia;o__Lachnospirales;f__Lachnospiraceae;g__Lachnoanaerobaculum;s__NA	0.911797	0.979338	4.13668	4.28561	-0.0398235
k__Bacteria;p__Bacteroidota;c__Bacteroidia;o__Bacteroidales;f__Tannerellaceae;g__Tannerella;s__NA	0.911797	0.979338	4.797	4.92046	-0.0294724
k__Bacteria;p__Actinobacteriota;c__Actinobacteria;o__Actinomycetales;f__Actinomycetaceae;g__Actinomyces;s__naeslundii	0.911797	0.979338	3.2642	3.65438	-0.121283
k__Bacteria;p__Bacteroidota;c__Bacteroidia;o__Bacteroidales;f__Prevotellaceae;g__Prevotella;s__salivae	0.911797	0.979338	1.98133	2.26014	-0.121764
k__Bacteria;p__Bacteroidota;c__Bacteroidia;o__Bacteroidales;f__Prevotellaceae;g__Prevotella;s__oulorum	0.970512	1	3.77112	3.64921	0.0359337
k__Bacteria;p__Firmicutes;c__Bacilli;o__Lactobacillales;f__Streptococcaceae;g__Streptococcus;s__intermedius	0.970512	1	2.40581	2.71006	-0.117347
k__Bacteria;p__Fusobacteriota;c__Fusobacteriia;o__Fusobacteriales;f__Fusobacteriaceae;g__Fusobacterium;s__nucleatum	1	1	7.19944	7.24775	-0.00829044
k__Bacteria;p__Actinobacteriota;c__Actinobacteria;o__Corynebacteriales;f__Corynebacteriaceae;g__Corynebacterium;s__matruchotii	1	1	6.35401	6.57819	-0.042277
k__Bacteria;p__Proteobacteria;c__Gammaproteobacteria;o__Burkholderiales;f__Neisseriaceae;g__Neisseria;s__elongata	1	1	4.29723	3.83222	0.127885
k__Bacteria;p__Actinobacteriota;c__Actinobacteria;o__Actinomycetales;f__Actinomycetaceae;g__Actinomyces;s__NA	1	1	4.31785	4.05542	0.0705006

## Sheet: Wilcox Tongue Species
Species	p.value	adj.p.value	mean1	mean2	log2FC
k__Bacteria;p__Firmicutes;c__Bacilli;o__Staphylococcales;f__Gemellaceae;g__Gemella;s__NA	0.000487129	0.0248436	5.49214	2.75252	0.703767
k__Bacteria;p__Actinobacteriota;c__Actinobacteria;o__Micrococcales;f__Micrococcaceae;g__Rothia;s__mucilaginosa	0.00150469	0.0383695	7.58801	5.72025	0.32767
k__Bacteria;p__Actinobacteriota;c__Actinobacteria;o__Actinomycetales;f__Actinomycetaceae;g__Actinomyces;s__NA	0.00519604	0.0883327	6.09117	4.84012	0.255943
k__Bacteria;p__Bacteroidota;c__Bacteroidia;o__Bacteroidales;f__Porphyromonadaceae;g__Porphyromonas;s__NA	0.0089307	0.0910931	5.44964	2.77105	0.68898
k__Bacteria;p__Firmicutes;c__Bacilli;o__Lactobacillales;f__Carnobacteriaceae;g__Granulicatella;s__NA	0.0089307	0.0910931	6.97822	5.28485	0.317059
k__Bacteria;p__Firmicutes;c__Bacilli;o__Lactobacillales;f__Streptococcaceae;g__Streptococcus;s__NA	0.0114962	0.0977181	7.88834	6.20363	0.281856
k__Bacteria;p__Firmicutes;c__Bacilli;o__Lactobacillales;f__Streptococcaceae;g__Streptococcus;s__parasanguinis	0.0146896	0.107025	7.82667	6.05547	0.300091
k__Bacteria;p__Firmicutes;c__Bacilli;o__Lactobacillales;f__Streptococcaceae;g__Streptococcus;s__salivarius	0.0232306	0.13164	5.89452	3.96684	0.428664
k__Bacteria;p__Actinobacteriota;c__Actinobacteria;o__Actinomycetales;f__Actinomycetaceae;g__Actinomyces;s__graevenitzii	0.0232306	0.13164	3.87219	2.26868	0.499763
k__Bacteria;p__Firmicutes;c__Clostridia;o__Lachnospirales;f__Lachnospiraceae;g__Stomatobaculum;s__NA	0.0288056	0.146908	5.88835	4.6995	0.249239
k__Bacteria;p__Firmicutes;c__Bacilli;o__Lactobacillales;f__Streptococcaceae;g__Streptococcus;s__oralis	0.035463	0.164419	6.93328	5.75054	0.215121
k__Bacteria;p__Firmicutes;c__Clostridia;o__Lachnospirales;f__Lachnospiraceae;g__NA;s__NA	0.0524259	0.22281	3.43246	2.04208	0.465987
k__Bacteria;p__Firmicutes;c__Negativicutes;o__Veillonellales-Selenomonadales;f__Veillonellaceae;g__Veillonella;s__parvula	0.075256	0.274147	4.00313	2.55336	0.43153
k__Bacteria;p__Firmicutes;c__Clostridia;o__Lachnospirales;f__Lachnospiraceae;g__Oribacterium;s__sinus	0.075256	0.274147	2.81573	1.36063	0.575995
k__Bacteria;p__Proteobacteria;c__Gammaproteobacteria;o__Burkholderiales;f__Neisseriaceae;g__Neisseria;s__subflava	0.105122	0.357416	5.47373	4.06657	0.319757
k__Bacteria;p__Bacteroidota;c__Bacteroidia;o__Bacteroidales;f__Prevotellaceae;g__Prevotella;s__nanceiensis	0.14314	0.456259	4.19703	2.89901	0.365369
k__Bacteria;p__Proteobacteria;c__Gammaproteobacteria;o__Enterobacterales;f__Pasteurellaceae;g__Haemophilus;s__parainfluenzae	0.279861	0.839583	7.07328	6.24116	0.145427
k__Bacteria;p__Firmicutes;c__Negativicutes;o__Veillonellales-Selenomonadales;f__Veillonellaceae;g__Veillonella;s__dispar	0.314999	0.892498	3.41216	4.95713	-0.387313
k__Bacteria;p__Bacteroidota;c__Bacteroidia;o__Bacteroidales;f__Prevotellaceae;g__Prevotella;s__histicola	0.393048	0.946192	6.84369	5.97797	0.155971
k__Bacteria;p__Firmicutes;c__Clostridia;o__Lachnospirales;f__Lachnospiraceae;g__Oribacterium;s__NA	0.435872	0.946192	4.87617	4.77546	0.0225948
k__Bacteria;p__Firmicutes;c__Negativicutes;o__Veillonellales-Selenomonadales;f__Veillonellaceae;g__Veillonella;s__atypica	0.528849	0.946192	5.02519	6.80682	-0.343382
k__Bacteria;p__Actinobacteriota;c__Coriobacteriia;o__Coriobacteriales;f__Atopobiaceae;g__Atopobium;s__NA	0.528849	0.946192	5.29089	5.48088	-0.0392123
k__Bacteria;p__Firmicutes;c__Clostridia;o__Clostridia UCG-014;f__NA;g__NA;s__NA	0.528849	0.946192	4.13755	3.9492	0.0481171
k__Bacteria;p__Patescibacteria;c__Saccharimonadia;o__Saccharimonadales;f__Saccharimonadaceae;g__Candidatus Saccharimonas;s__NA	0.528849	0.946192	3.37364	3.88553	-0.1412
k__Bacteria;p__Firmicutes;c__Clostridia;o__Lachnospirales;f__Lachnospiraceae;g__Catonella;s__NA	0.528849	0.946192	3.13909	3.43461	-0.0871867
k__Bacteria;p__Firmicutes;c__Clostridia;o__Peptostreptococcales-Tissierellales;f__Anaerovoracaceae;g__Mogibacterium;s__diversum	0.528849	0.946192	3.83089	3.43417	0.109337
k__Bacteria;p__Firmicutes;c__Bacilli;o__Erysipelotrichales;f__Erysipelotrichaceae;g__Solobacterium;s__moorei	0.630529	0.946192	5.42572	5.45677	-0.00635671
k__Bacteria;p__Fusobacteriota;c__Fusobacteriia;o__Fusobacteriales;f__Leptotrichiaceae;g__Leptotrichia;s__wadei	0.630529	0.946192	1.84878	2.52217	-0.256998
k__Bacteria;p__Firmicutes;c__Negativicutes;o__Veillonellales-Selenomonadales;f__Veillonellaceae;g__Veillonella;s__NA	0.684211	0.946192	7.59021	7.47266	0.0185621
k__Bacteria;p__Bacteroidota;c__Bacteroidia;o__Bacteroidales;f__Prevotellaceae;g__Alloprevotella;s__NA	0.684211	0.946192	6.00923	6.5851	-0.105187
k__Bacteria;p__Actinobacteriota;c__Actinobacteria;o__Actinomycetales;f__Actinomycetaceae;g__Actinomyces;s__pacaensis	0.684211	0.946192	3.86073	3.87948	-0.00494089
k__Bacteria;p__Proteobacteria;c__Gammaproteobacteria;o__Burkholderiales;f__Neisseriaceae;g__Neisseria;s__NA	0.684211	0.946192	2.38376	2.33602	0.0173707
k__Bacteria;p__Firmicutes;c__Negativicutes;o__Veillonellales-Selenomonadales;f__Selenomonadaceae;g__Selenomonas;s__NA	0.684211	0.946192	3.0972	2.88682	0.0660402
k__Bacteria;p__Firmicutes;c__Bacilli;o__Lactobacillales;f__Streptococcaceae;g__Streptococcus;s__infantis	0.684211	0.946192	2.47335	3.53535	-0.333901
k__Bacteria;p__Bacteroidota;c__Bacteroidia;o__Bacteroidales;f__Prevotellaceae;g__Alloprevotella;s__rava	0.684211	0.946192	2.51965	3.3213	-0.256248
k__Bacteria;p__Fusobacteriota;c__Fusobacteriia;o__Fusobacteriales;f__Leptotrichiaceae;g__Leptotrichia;s__NA	0.739364	0.946192	6.16024	5.68283	0.0915452
k__Bacteria;p__Firmicutes;c__Clostridia;o__Peptostreptococcales-Tissierellales;f__Peptostreptococcaceae;g__Peptostreptococcus;s__stomatis	0.739364	0.946192	4.9733	5.18628	-0.0459706
k__Bacteria;p__Firmicutes;c__Clostridia;o__Lachnospirales;f__Lachnospiraceae;g__Oribacterium;s__asaccharolyticum	0.739364	0.946192	3.06926	2.80214	0.0849018
k__Bacteria;p__Bacteroidota;c__Bacteroidia;o__Bacteroidales;f__Prevotellaceae;g__Prevotella;s__salivae	0.795936	0.946192	5.73321	5.73579	-0.000507015
k__Bacteria;p__Bacteroidota;c__Bacteroidia;o__Bacteroidales;f__Prevotellaceae;g__Prevotella;s__NA	0.853428	0.946192	6.02866	6.3175	-0.0535835
k__Bacteria;p__Patescibacteria;c__Saccharimonadia;o__Saccharimonadales;f__Saccharimonadaceae;g__TM7x;s__NA	0.853428	0.946192	5.38885	5.86353	-0.0947412
k__Bacteria;p__Firmicutes;c__Clostridia;o__Lachnospirales;f__Lachnospiraceae;g__Lachnoanaerobaculum;s__NA	0.853428	0.946192	4.80781	4.74956	0.0131668
k__Bacteria;p__Firmicutes;c__Clostridia;o__Peptostreptococcales-Tissierellales;f__Anaerovoracaceae;g__[Eubacterium] nodatum group;s__sulci	0.853428	0.946192	4.42617	4.72609	-0.0700178
k__Bacteria;p__Bacteroidota;c__Bacteroidia;o__Bacteroidales;f__Prevotellaceae;g__Prevotella;s__jejuni	0.853428	0.946192	3.24129	3.94852	-0.196532
k__Bacteria;p__Patescibacteria;c__Saccharimonadia;o__Saccharimonadales;f__NA;g__NA;s__NA	0.853428	0.946192	2.53899	2.29467	0.0876733
k__Bacteria;p__Campylobacterota;c__Campylobacteria;o__Campylobacterales;f__Campylobacteraceae;g__Campylobacter;s__NA	0.853428	0.946192	2.28395	2.62271	-0.120505
k__Bacteria;p__Bacteroidota;c__Bacteroidia;o__Bacteroidales;f__Prevotellaceae;g__Prevotella;s__melaninogenica	0.911797	0.968785	8.14326	8.11422	0.00430441
k__Bacteria;p__Fusobacteriota;c__Fusobacteriia;o__Fusobacteriales;f__Fusobacteriaceae;g__Fusobacterium;s__periodonticum	0.911797	0.968785	5.80681	5.90105	-0.018229
k__Bacteria;p__Bacteroidota;c__Bacteroidia;o__Bacteroidales;f__Prevotellaceae;g__Prevotella;s__oulorum	0.970512	1	3.06066	2.99005	0.0220029
k__Bacteria;p__Campylobacterota;c__Campylobacteria;o__Campylobacterales;f__Campylobacteraceae;g__Campylobacter;s__concisus	1	1	5.26585	5.36143	-0.0199314
k__Bacteria;p__Bacteroidota;c__Bacteroidia;o__Bacteroidales;f__Prevotellaceae;g__Prevotella;s__pallens	1	1	5.56666	5.67315	-0.0212653

[truncated: 6 more sheets: Group Alpha Diversity Wilcox , Site Alpha Diversity, Associations Tongue Genus, Associations Tongue Species, Associations Plaque Genus, Associations Plaque Species]
